# Supplementary material for: The tree species pool of Amazonian wetland forests: Which species can assemble in periodically waterlogged habitats?
Source: PLoS One. 2018 May 29;13(5):e0198130. doi: 10.1371/journal.pone.0198130 (PMC5973586; doi:10.1371/journal.pone.0198130)
Supplement: S3 Table — (XLSX) [file pone.0198130.s003.xlsx]

## Sheet: S3Table Tree species checklist
ID	Family	Species	Dataset	The tree species pool of Amazonian wetland forests: which species can assemble in periodically waterlogged habitats?
1	Achariaceae	Carpotroche crispidentata	BC	Bruno Garcia Luize, José Leonardo Lima Magalhães, Helder Queiroz, Maria Aparecida Lopes, Eduardo Martins Venticinque, Evlyn Márcia Leão de Moraes Novo, and Thiago Sanna Freire Silva
2	Achariaceae	Carpotroche longifolia	BC	S3 Table. Checklist of the Amazonian wetlands tree species pool. The source dataset for each species included (BC- Botanical Collections; TSL-Tree species lists). Version: 1.0 - 12/10/2017
3	Achariaceae	Lindackeria latifolia	TSL & BC
4	Achariaceae	Lindackeria paludosa	TSL & BC
5	Achariaceae	Lindackeria paraensis	BC
6	Achariaceae	Lindackeria pauciflora	BC
7	Achariaceae	Mayna odorata	BC
8	Achatocarpaceae	Achatocarpus praecox	TSL
9	Anacardiaceae	Anacardium giganteum	TSL & BC
10	Anacardiaceae	Anacardium microsepalum	BC
11	Anacardiaceae	Anacardium occidentale	BC
12	Anacardiaceae	Anacardium parvifolium	TSL
13	Anacardiaceae	Anacardium spruceanum	BC
14	Anacardiaceae	Antrocaryon amazonicum	BC
15	Anacardiaceae	Astronium fraxinifolium	TSL
16	Anacardiaceae	Astronium gracile	TSL
17	Anacardiaceae	Astronium graveolens	TSL
18	Anacardiaceae	Astronium lecointei	TSL & BC
19	Anacardiaceae	Astronium ulei	BC
20	Anacardiaceae	Campnosperma gummifera	TSL
21	Anacardiaceae	Campnosperma gummiferum	BC
22	Anacardiaceae	Mangifera indica	TSL
23	Anacardiaceae	Myracrodruon urundeuva	TSL
24	Anacardiaceae	Schinopsis brasiliensis	TSL
25	Anacardiaceae	Spondias mombin	TSL & BC
26	Anacardiaceae	Spondias testudinis	TSL
27	Anacardiaceae	Spondias tuberosa	TSL
28	Anacardiaceae	Spondias venosa	TSL
29	Anacardiaceae	Tapirira guianensis	TSL & BC
30	Anacardiaceae	Tapirira myriantha	TSL
31	Anacardiaceae	Tapirira obtusa	TSL & BC
32	Anacardiaceae	Tapirira retusa	TSL & BC
33	Anacardiaceae	Thyrsodium rondonianum	BC
34	Anacardiaceae	Thyrsodium spruceanum	TSL & BC
35	Anisophylleaceae	Polygonanthus amazonicus	BC
36	Annonaceae	Anaxagorea acuminata	TSL & BC
37	Annonaceae	Anaxagorea angustifolia	TSL
38	Annonaceae	Anaxagorea brevipedicellata	BC
39	Annonaceae	Anaxagorea brevipes	TSL & BC
40	Annonaceae	Anaxagorea dolichocarpa	TSL & BC
41	Annonaceae	Anaxagorea phaeocarpa	TSL & BC
42	Annonaceae	Anaxagorea rufa	TSL
43	Annonaceae	Annona amazonica	BC
44	Annonaceae	Annona ambotay	TSL & BC
45	Annonaceae	Annona atabapensis	TSL
46	Annonaceae	Annona calcarata	BC
47	Annonaceae	Annona cuspidata	TSL & BC
48	Annonaceae	Annona densicoma	TSL & BC
49	Annonaceae	Annona dolichophylla	TSL
50	Annonaceae	Annona duckei	TSL & BC
51	Annonaceae	Annona edulis	BC
52	Annonaceae	Annona emarginata	TSL
53	Annonaceae	Annona exsucca	TSL & BC
54	Annonaceae	Annona foetida	TSL & BC
55	Annonaceae	Annona fosteri	TSL
56	Annonaceae	Annona glabra	TSL & BC
57	Annonaceae	Annona glomerulifera	TSL
58	Annonaceae	Annona haematantha	TSL
59	Annonaceae	Annona hypoglauca	TSL & BC
60	Annonaceae	Annona jahnii	TSL
61	Annonaceae	Annona montana	TSL & BC
62	Annonaceae	Annona mucosa	BC
63	Annonaceae	Annona neoinsignis	TSL & BC
64	Annonaceae	Annona paludosa	BC
65	Annonaceae	Annona sericea	TSL
66	Annonaceae	Annona tenuipes	TSL & BC
67	Annonaceae	Bocageopsis canescens	TSL & BC
68	Annonaceae	Bocageopsis multiflora	TSL & BC
69	Annonaceae	Bocageopsis pleiosperma	TSL
70	Annonaceae	Cardiopetalum calophyllum	BC
71	Annonaceae	Cremastosperma brevipes	BC
72	Annonaceae	Cremastosperma gracilipes	TSL
73	Annonaceae	Cremastosperma microcarpum	BC
74	Annonaceae	Cremastosperma monospermum	BC
75	Annonaceae	Cymbopetalum brasiliense	TSL & BC
76	Annonaceae	Cymbopetalum euneurum	BC
77	Annonaceae	Cymbopetalum longipes	BC
78	Annonaceae	Diclinanona calycina	TSL
79	Annonaceae	Diclinanona tessmannii	TSL
80	Annonaceae	Duguetia argentea	BC
81	Annonaceae	Duguetia asterotricha	TSL
82	Annonaceae	Duguetia cadaverica	TSL
83	Annonaceae	Duguetia calycina	TSL & BC
84	Annonaceae	Duguetia cauliflora	TSL & BC
85	Annonaceae	Duguetia chrysea	TSL & BC
86	Annonaceae	Duguetia duckei	TSL
87	Annonaceae	Duguetia echinophora	TSL & BC
88	Annonaceae	Duguetia flagellaris	TSL & BC
89	Annonaceae	Duguetia furfuracea	TSL
90	Annonaceae	Duguetia hadrantha	TSL & BC
91	Annonaceae	Duguetia latifolia	TSL & BC
92	Annonaceae	Duguetia lepidota	TSL & BC
93	Annonaceae	Duguetia longicuspis	TSL & BC
94	Annonaceae	Duguetia macrophylla	BC
95	Annonaceae	Duguetia megalocarpa	BC
96	Annonaceae	Duguetia megalophylla	TSL
97	Annonaceae	Duguetia odorata	TSL & BC
98	Annonaceae	Duguetia pycnastera	TSL
99	Annonaceae	Duguetia quitarensis	TSL & BC
100	Annonaceae	Duguetia riberensis	TSL
101	Annonaceae	Duguetia riparia	TSL & BC
102	Annonaceae	Duguetia spixiana	TSL & BC
103	Annonaceae	Duguetia stelechantha	TSL & BC
104	Annonaceae	Duguetia surinamensis	TSL & BC
105	Annonaceae	Duguetia ulei	TSL
106	Annonaceae	Duguetia uniflora	TSL & BC
107	Annonaceae	Duguetia yeshidan	TSL & BC
108	Annonaceae	Ephedranthus amazonicus	BC
109	Annonaceae	Ephedranthus guianensis	TSL
110	Annonaceae	Ephedranthus parviflorus	TSL
111	Annonaceae	Fusaea longifolia	TSL & BC
112	Annonaceae	Fusaea peruviana	BC
113	Annonaceae	Guatteria acutissima	TSL
114	Annonaceae	Guatteria alata	TSL
115	Annonaceae	Guatteria asplundiana	TSL
116	Annonaceae	Guatteria atra	TSL
117	Annonaceae	Guatteria blepharophylla	TSL & BC
118	Annonaceae	Guatteria cardoniana	TSL
119	Annonaceae	Guatteria citriodora	BC
120	Annonaceae	Guatteria crassipes	TSL
121	Annonaceae	Guatteria cryandra	TSL
122	Annonaceae	Guatteria decurrens	TSL & BC
123	Annonaceae	Guatteria dielsiana	TSL
124	Annonaceae	Guatteria discolor	TSL & BC
125	Annonaceae	Guatteria duckeana	BC
126	Annonaceae	Guatteria dura	TSL & BC
127	Annonaceae	Guatteria ferruginea	TSL
128	Annonaceae	Guatteria foliosa	TSL & BC
129	Annonaceae	Guatteria glauca	TSL
130	Annonaceae	Guatteria guianensis	TSL & BC
131	Annonaceae	Guatteria heteropetala	BC
132	Annonaceae	Guatteria hirsuta	BC
133	Annonaceae	Guatteria hispida	TSL
134	Annonaceae	Guatteria insculpta	TSL
135	Annonaceae	Guatteria inundata	TSL & BC
136	Annonaceae	Guatteria latipetala	TSL
137	Annonaceae	Guatteria liesneri	BC
138	Annonaceae	Guatteria longicuspis	TSL & BC
139	Annonaceae	Guatteria maypurensis	TSL
140	Annonaceae	Guatteria megalophylla	TSL & BC
141	Annonaceae	Guatteria meliodora	TSL & BC
142	Annonaceae	Guatteria microsperma	TSL
143	Annonaceae	Guatteria obovata	TSL
144	Annonaceae	Guatteria olivacea	TSL
145	Annonaceae	Guatteria ovalifolia	TSL
146	Annonaceae	Guatteria phanerocampta	TSL
147	Annonaceae	Guatteria pilosula	TSL
148	Annonaceae	Guatteria poeppigiana	TSL
149	Annonaceae	Guatteria procera	TSL
150	Annonaceae	Guatteria pteropus	TSL
151	Annonaceae	Guatteria pubens	TSL
152	Annonaceae	Guatteria punctata	TSL & BC
153	Annonaceae	Guatteria ramiflora	TSL
154	Annonaceae	Guatteria riparia	TSL
155	Annonaceae	Guatteria schomburgkiana	TSL & BC
156	Annonaceae	Guatteria scytophylla	TSL & BC
157	Annonaceae	Guatteria stenopetala	TSL
158	Annonaceae	Guatteria subsessilis	TSL & BC
159	Annonaceae	Guatteria trichocarpa	BC
160	Annonaceae	Guatteria ucayalina	BC
161	Annonaceae	Guatteria wachenheimi	TSL
162	Annonaceae	Guatteria williamsii	TSL
163	Annonaceae	Klarobelia cauliflora	TSL
164	Annonaceae	Klarobelia inundata	BC
165	Annonaceae	Klarobelia napoensis	TSL
166	Annonaceae	Malmea dielsiana	TSL
167	Annonaceae	Onychopetalum amazonicum	TSL
168	Annonaceae	Onychopetalum periquino	BC
169	Annonaceae	Oxandra asbeckii	TSL
170	Annonaceae	Oxandra espintana	TSL & BC
171	Annonaceae	Oxandra euneura	TSL
172	Annonaceae	Oxandra macrophylla	TSL
173	Annonaceae	Oxandra mediocris	TSL
174	Annonaceae	Oxandra polyantha	TSL & BC
175	Annonaceae	Oxandra riedeliana	TSL & BC
176	Annonaceae	Oxandra sphaerocarpa	TSL
177	Annonaceae	Oxandra xylopioides	TSL & BC
178	Annonaceae	Porcelia ponderosa	TSL & BC
179	Annonaceae	Pseudomalmea diclina	TSL & BC
180	Annonaceae	Pseudoxandra cuspidata	BC
181	Annonaceae	Pseudoxandra leiophylla	TSL & BC
182	Annonaceae	Pseudoxandra lucida	TSL & BC
183	Annonaceae	Pseudoxandra pacifica	TSL
184	Annonaceae	Pseudoxandra papillosa	BC
185	Annonaceae	Pseudoxandra polyphleba	TSL & BC
186	Annonaceae	Rollinia cuspidata	TSL
187	Annonaceae	Ruizodendron ovale	TSL & BC
188	Annonaceae	Tetrameranthus duckei	TSL & BC
189	Annonaceae	Tetrameranthus laomae	TSL & BC
190	Annonaceae	Trigynaea duckei	TSL
191	Annonaceae	Trigynaea triplinervis	TSL
192	Annonaceae	Unonopsis duckei	TSL & BC
193	Annonaceae	Unonopsis floribunda	TSL & BC
194	Annonaceae	Unonopsis guatterioides	TSL & BC
195	Annonaceae	Unonopsis peruviana	BC
196	Annonaceae	Unonopsis spectabilis	BC
197	Annonaceae	Unonopsis stipitata	TSL & BC
198	Annonaceae	Xylopia amazonica	TSL & BC
199	Annonaceae	Xylopia aromatica	TSL & BC
200	Annonaceae	Xylopia barbata	TSL
201	Annonaceae	Xylopia benthamii	TSL & BC
202	Annonaceae	Xylopia calophylla	TSL & BC
203	Annonaceae	Xylopia crinita	TSL
204	Annonaceae	Xylopia cuspidata	BC
205	Annonaceae	Xylopia discreta	BC
206	Annonaceae	Xylopia emarginata	TSL & BC
207	Annonaceae	Xylopia excellens	TSL
208	Annonaceae	Xylopia frutescens	TSL & BC
209	Annonaceae	Xylopia ligustrifolia	TSL & BC
210	Annonaceae	Xylopia macrantha	TSL
211	Annonaceae	Xylopia nitida	TSL & BC
212	Annonaceae	Xylopia ochrantha	TSL
213	Annonaceae	Xylopia parviflora	TSL
214	Annonaceae	Xylopia peruviana	TSL
215	Annonaceae	Xylopia polyantha	TSL & BC
216	Annonaceae	Xylopia sericea	TSL & BC
217	Annonaceae	Xylopia spruceana	TSL & BC
218	Apocynaceae	Allamanda nobilis	TSL
219	Apocynaceae	Ambelania acida	TSL & BC
220	Apocynaceae	Ambelania duckei	TSL & BC
221	Apocynaceae	Aspidosperma album	BC
222	Apocynaceae	Aspidosperma araracanga	TSL & BC
223	Apocynaceae	Aspidosperma auriculatum	TSL
224	Apocynaceae	Aspidosperma carapanauba	TSL
225	Apocynaceae	Aspidosperma cuspa	BC
226	Apocynaceae	Aspidosperma darienense	TSL
227	Apocynaceae	Aspidosperma desmanthum	TSL & BC
228	Apocynaceae	Aspidosperma excelsum	TSL & BC
229	Apocynaceae	Aspidosperma inundatum	TSL
230	Apocynaceae	Aspidosperma leucocymosum	TSL
231	Apocynaceae	Aspidosperma macrocarpon	TSL
232	Apocynaceae	Aspidosperma multiflorum	TSL
233	Apocynaceae	Aspidosperma myristicifolium	BC
234	Apocynaceae	Aspidosperma oblongum	TSL
235	Apocynaceae	Aspidosperma pachypterum	BC
236	Apocynaceae	Aspidosperma parvifolium	TSL & BC
237	Apocynaceae	Aspidosperma rigidum	TSL & BC
238	Apocynaceae	Aspidosperma sandwithianum	TSL
239	Apocynaceae	Aspidosperma schultesii	TSL & BC
240	Apocynaceae	Aspidosperma spruceanum	TSL & BC
241	Apocynaceae	Aspidosperma subincanum	TSL
242	Apocynaceae	Aspidosperma verruculosum	TSL
243	Apocynaceae	Bonafousia rupicola	TSL
244	Apocynaceae	Couma catingae	TSL
245	Apocynaceae	Couma guianensis	TSL & BC
246	Apocynaceae	Couma macrocarpa	TSL & BC
247	Apocynaceae	Couma utilis	TSL & BC
248	Apocynaceae	Geissospermum argenteum	BC
249	Apocynaceae	Geissospermum laeve	BC
250	Apocynaceae	Himatanthus articulatus	TSL & BC
251	Apocynaceae	Himatanthus attenuatus	TSL & BC
252	Apocynaceae	Himatanthus bracteatus	TSL
253	Apocynaceae	Himatanthus lancifolius	TSL
254	Apocynaceae	Himatanthus obovatus	TSL & BC
255	Apocynaceae	Himatanthus phagedaenicus	BC
256	Apocynaceae	Himatanthus revolutus	BC
257	Apocynaceae	Himatanthus semilunatus	TSL & BC
258	Apocynaceae	Himatanthus tarapotensis	TSL & BC
259	Apocynaceae	Lacmellea aculeata	TSL & BC
260	Apocynaceae	Lacmellea arborescens	TSL & BC
261	Apocynaceae	Lacmellea edulis	BC
262	Apocynaceae	Lacmellea gracilis	TSL
263	Apocynaceae	Lacmellea lactescens	TSL & BC
264	Apocynaceae	Lacmellea ramosissima	BC
265	Apocynaceae	Laxoplumeria tessmannii	TSL
266	Apocynaceae	Macoubea guianensis	TSL & BC
267	Apocynaceae	Macoubea sprucei	TSL & BC
268	Apocynaceae	Malouetia amazonica	BC
269	Apocynaceae	Malouetia aquatica	BC
270	Apocynaceae	Malouetia calva	TSL
271	Apocynaceae	Malouetia duckei	BC
272	Apocynaceae	Malouetia flavescens	TSL
273	Apocynaceae	Malouetia glandulifera	TSL & BC
274	Apocynaceae	Malouetia gracillima	BC
275	Apocynaceae	Malouetia lata	TSL
276	Apocynaceae	Malouetia naias	TSL & BC
277	Apocynaceae	Malouetia peruviana	TSL
278	Apocynaceae	Malouetia tamaquarina	TSL
279	Apocynaceae	Malouetia virescens	TSL & BC
280	Apocynaceae	Microplumeria anomala	TSL & BC
281	Apocynaceae	Molongum laxum	BC
282	Apocynaceae	Molongum zschokkeiforme	BC
283	Apocynaceae	Odontadenia puncticulosa	TSL
284	Apocynaceae	Odontadenia stemmadeniifolia	TSL
285	Apocynaceae	Parahancornia fasciculata	TSL & BC
286	Apocynaceae	Parahancornia negroensis	TSL & BC
287	Apocynaceae	Parahancornia oblonga	TSL & BC
288	Apocynaceae	Parahancornia peruviana	TSL
289	Apocynaceae	Plumeria inodora	TSL
290	Apocynaceae	Rauvolfia andina	BC
291	Apocynaceae	Rauvolfia paraensis	BC
292	Apocynaceae	Rauvolfia polyphylla	TSL & BC
293	Apocynaceae	Rauvolfia praecox	BC
294	Apocynaceae	Rauvolfia sprucei	TSL & BC
295	Apocynaceae	Rhabdadenia madida	TSL
296	Apocynaceae	Rhigospira quadrangularis	TSL & BC
297	Apocynaceae	Spongiosperma cataractarum	TSL
298	Apocynaceae	Spongiosperma grandiflorum	TSL & BC
299	Apocynaceae	Spongiosperma longilobum	BC
300	Apocynaceae	Tabernaemontana angulata	BC
301	Apocynaceae	Tabernaemontana catharinensis	TSL
302	Apocynaceae	Tabernaemontana coriacea	TSL
303	Apocynaceae	Tabernaemontana cymosa	TSL & BC
304	Apocynaceae	Tabernaemontana disticha	TSL
305	Apocynaceae	Tabernaemontana flavicans	TSL & BC
306	Apocynaceae	Tabernaemontana linkii	BC
307	Apocynaceae	Tabernaemontana macrocalyx	TSL
308	Apocynaceae	Tabernaemontana markgrafiana	TSL
309	Apocynaceae	Tabernaemontana maxima	BC
310	Apocynaceae	Tabernaemontana muricata	TSL & BC
311	Apocynaceae	Tabernaemontana rupicola	TSL & BC
312	Apocynaceae	Tabernaemontana sananho	TSL & BC
313	Apocynaceae	Tabernaemontana siphilitica	TSL & BC
314	Apocynaceae	Tabernaemontana undulata	TSL
315	Apocynaceae	Thevetia peruviana	BC
316	Aquifoliaceae	Ilex affinis	TSL
317	Aquifoliaceae	Ilex divaricata	TSL
318	Aquifoliaceae	Ilex guayusa	TSL
319	Aquifoliaceae	Ilex inundata	TSL & BC
320	Aquifoliaceae	Ilex laureola	TSL
321	Aquifoliaceae	Ilex martiniana	TSL
322	Aquifoliaceae	Ilex oliveriana	BC
323	Aquifoliaceae	Ilex ovalis	TSL
324	Aquifoliaceae	Ilex petiolaris	BC
325	Aquifoliaceae	Ilex umbellata	TSL
326	Araliaceae	Aralia soratensis	TSL
327	Araliaceae	Dendropanax arboreus	BC
328	Araliaceae	Dendropanax cuneatus	TSL & BC
329	Araliaceae	Dendropanax macropodus	TSL
330	Araliaceae	Dendropanax palustris	TSL & BC
331	Araliaceae	Dendropanax resinosus	BC
332	Araliaceae	Dendropanax tessmannii	TSL
333	Araliaceae	Schefflera confusa	BC
334	Araliaceae	Schefflera decaphylla	TSL & BC
335	Araliaceae	Schefflera morototoni	TSL & BC
336	Araliaceae	Schefflera spruceana	BC
337	Araliaceae	Schefflera umbrosa	BC
338	Arecaceae	Astrocaryum acaule	TSL
339	Arecaceae	Astrocaryum aculeatum	TSL
340	Arecaceae	Astrocaryum chambira	TSL & BC
341	Arecaceae	Astrocaryum chonta	TSL & BC
342	Arecaceae	Astrocaryum farinosum	TSL
343	Arecaceae	Astrocaryum gynacanthum	TSL & BC
344	Arecaceae	Astrocaryum jauari	TSL & BC
345	Arecaceae	Astrocaryum murumuru	TSL & BC
346	Arecaceae	Astrocaryum sciophilum	TSL
347	Arecaceae	Astrocaryum ulei	BC
348	Arecaceae	Astrocaryum vulgare	TSL & BC
349	Arecaceae	Attalea butyracea	TSL & BC
350	Arecaceae	Attalea huebneri	TSL
351	Arecaceae	Attalea insignis	TSL & BC
352	Arecaceae	Attalea maripa	TSL & BC
353	Arecaceae	Attalea microcarpa	BC
354	Arecaceae	Attalea phalerata	TSL & BC
355	Arecaceae	Attalea racemosa	TSL
356	Arecaceae	Attalea speciosa	TSL
357	Arecaceae	Bactris acanthocarpa	TSL & BC
358	Arecaceae	Bactris acanthocarpoides	BC
359	Arecaceae	Bactris bidentula	BC
360	Arecaceae	Bactris bifida	BC
361	Arecaceae	Bactris brongniartii	TSL & BC
362	Arecaceae	Bactris campestris	TSL & BC
363	Arecaceae	Bactris concinna	TSL & BC
364	Arecaceae	Bactris constanciae	TSL & BC
365	Arecaceae	Bactris elegans	TSL & BC
366	Arecaceae	Bactris gasipaes	TSL
367	Arecaceae	Bactris gastoniana	BC
368	Arecaceae	Bactris glaucescens	BC
369	Arecaceae	Bactris guineensis	TSL
370	Arecaceae	Bactris hirta	TSL & BC
371	Arecaceae	Bactris macroacantha	BC
372	Arecaceae	Bactris major	TSL & BC
373	Arecaceae	Bactris maraja	TSL & BC
374	Arecaceae	Bactris martiana	BC
375	Arecaceae	Bactris pilosa	TSL
376	Arecaceae	Bactris riparia	TSL & BC
377	Arecaceae	Bactris simplicifrons	TSL
378	Arecaceae	Barcella odora	BC
379	Arecaceae	Chamaedorea pinnatifrons	TSL
380	Arecaceae	Chelyocarpus chuco	TSL & BC
381	Arecaceae	Chelyocarpus ulei	BC
382	Arecaceae	Copernicia prunifera	TSL
383	Arecaceae	Desmoncus mitis	TSL
384	Arecaceae	Desmoncus polyacanthos	TSL
385	Arecaceae	Desmoncus setosus	TSL
386	Arecaceae	Dictyocaryum ptarianum	TSL
387	Arecaceae	Elaeis oleifera	BC
388	Arecaceae	Euterpe catinga	TSL
389	Arecaceae	Euterpe oleracea	TSL & BC
390	Arecaceae	Euterpe precatoria	TSL & BC
391	Arecaceae	Geonoma baculifera	TSL
392	Arecaceae	Geonoma deversa	TSL
393	Arecaceae	Geonoma laxiflora	TSL
394	Arecaceae	Geonoma macrostachys	TSL
395	Arecaceae	Geonoma maxima	TSL
396	Arecaceae	Geonoma stricta	TSL
397	Arecaceae	Iriartea deltoidea	TSL
398	Arecaceae	Iriartella setigera	TSL
399	Arecaceae	Leopoldinia major	BC
400	Arecaceae	Leopoldinia piassaba	TSL & BC
401	Arecaceae	Leopoldinia pulchra	TSL & BC
402	Arecaceae	Lepidocaryum tenue	TSL
403	Arecaceae	Manicaria saccifera	TSL & BC
404	Arecaceae	Mauritia carana	TSL
405	Arecaceae	Mauritia flexuosa	TSL & BC
406	Arecaceae	Mauritiella aculeata	TSL & BC
407	Arecaceae	Mauritiella armata	TSL & BC
408	Arecaceae	Oenocarpus bacaba	TSL & BC
409	Arecaceae	Oenocarpus bataua	TSL & BC
410	Arecaceae	Oenocarpus distichus	TSL & BC
411	Arecaceae	Oenocarpus mapora	TSL & BC
412	Arecaceae	Oenocarpus minor	TSL & BC
413	Arecaceae	Phytelephas macrocarpa	TSL
414	Arecaceae	Phytelephas tenuicaulis	TSL
415	Arecaceae	Raphia taedigera	TSL
416	Arecaceae	Socratea exorrhiza	TSL & BC
417	Arecaceae	Syagrus cocoides	TSL & BC
418	Arecaceae	Syagrus inajai	TSL & BC
419	Arecaceae	Wettinia maynensis	TSL
420	Asteraceae	Baccharis salicifolia	TSL
421	Asteraceae	Mikania gleasonii	TSL
422	Asteraceae	Piptocarpha poeppigiana	TSL
423	Asteraceae	Piptocarpha rotundifolia	BC
424	Asteraceae	Piptocoma schomburgkii	BC
425	Asteraceae	Tessaria integrifolia	TSL & BC
426	Asteraceae	Vernonia patens	TSL
427	Bignoniaceae	Adenocalymma bracteosum	TSL
428	Bignoniaceae	Adenocalymma flavidum	TSL
429	Bignoniaceae	Adenocalymma magnificum	TSL
430	Bignoniaceae	Adenocalymma pseudopatulum	TSL
431	Bignoniaceae	Anemopaegma chrysanthum	TSL
432	Bignoniaceae	Anemopaegma paraense	TSL
433	Bignoniaceae	Bignonia aequinoctialis	TSL
434	Bignoniaceae	Bignonia binata	TSL
435	Bignoniaceae	Crescentia amazonica	TSL & BC
436	Bignoniaceae	Crescentia cujete	TSL
437	Bignoniaceae	Dolichandra uncata	TSL
438	Bignoniaceae	Fridericia florida	TSL
439	Bignoniaceae	Godmania aesculifolia	BC
440	Bignoniaceae	Handroanthus barbatus	TSL & BC
441	Bignoniaceae	Handroanthus capitatus	TSL
442	Bignoniaceae	Handroanthus chrysotrichus	TSL
443	Bignoniaceae	Handroanthus heptaphyllus	TSL
444	Bignoniaceae	Handroanthus impetiginosus	TSL & BC
445	Bignoniaceae	Handroanthus ochraceus	TSL
446	Bignoniaceae	Handroanthus serratifolius	TSL & BC
447	Bignoniaceae	Jacaranda brasiliana	TSL
448	Bignoniaceae	Jacaranda copaia	TSL & BC
449	Bignoniaceae	Jacaranda cuspidifolia	TSL
450	Bignoniaceae	Jacaranda macrocarpa	TSL
451	Bignoniaceae	Jacaranda obtusifolia	TSL & BC
452	Bignoniaceae	Lundia densiflora	TSL
453	Bignoniaceae	Mansoa standleyi	TSL
454	Bignoniaceae	Pachyptera kerere	TSL
455	Bignoniaceae	Tabebuia aurea	TSL
456	Bignoniaceae	Tabebuia fluviatilis	TSL & BC
457	Bignoniaceae	Tabebuia insignis	TSL & BC
458	Bignoniaceae	Tabebuia ochracea	TSL
459	Bignoniaceae	Tabebuia stenocalyx	TSL
460	Bignoniaceae	Tanaecium pyramidatum	TSL
461	Bignoniaceae	Tanaecium tetragonolobum	TSL
462	Bignoniaceae	Tanaecium xanthophyllum	TSL
463	Bixaceae	Bixa arborea	TSL & BC
464	Bixaceae	Bixa excelsa	BC
465	Bixaceae	Bixa orellana	TSL
466	Bixaceae	Bixa urucurana	TSL
467	Bixaceae	Cochlospermum orinocense	TSL & BC
468	Boraginaceae	Cordia acutifolia	TSL
469	Boraginaceae	Cordia alliodora	TSL & BC
470	Boraginaceae	Cordia bicolor	BC
471	Boraginaceae	Cordia brasiliensis	TSL
472	Boraginaceae	Cordia collococca	TSL & BC
473	Boraginaceae	Cordia dentata	TSL
474	Boraginaceae	Cordia eriostigma	TSL
475	Boraginaceae	Cordia exaltata	TSL & BC
476	Boraginaceae	Cordia glabrata	TSL
477	Boraginaceae	Cordia goeldiana	TSL
478	Boraginaceae	Cordia hebeclada	TSL
479	Boraginaceae	Cordia kingstoniana	BC
480	Boraginaceae	Cordia latiloba	TSL
481	Boraginaceae	Cordia lomatoloba	TSL & BC
482	Boraginaceae	Cordia lutea	TSL
483	Boraginaceae	Cordia multispicata	TSL
484	Boraginaceae	Cordia naidophila	TSL & BC
485	Boraginaceae	Cordia nodosa	TSL & BC
486	Boraginaceae	Cordia panicularis	TSL
487	Boraginaceae	Cordia ripicola	BC
488	Boraginaceae	Cordia sagotii	TSL & BC
489	Boraginaceae	Cordia scabrifolia	TSL & BC
490	Boraginaceae	Cordia sellowiana	TSL & BC
491	Boraginaceae	Cordia sprucei	BC
492	Boraginaceae	Cordia tetrandra	TSL & BC
493	Boraginaceae	Cordia toqueve	BC
494	Boraginaceae	Cordia trichotoma	BC
495	Boraginaceae	Cordia ucayaliensis	BC
496	Boraginaceae	Cordia williamsii	TSL
497	Boraginaceae	Tournefortia bicolor	BC
498	Boraginaceae	Tournefortia cuspidata	BC
499	Boraginaceae	Tournefortia hirsutissima	BC
500	Boraginaceae	Varronia buddleoides	BC
501	Boraginaceae	Varronia spinescens	TSL
502	Burseraceae	Bursera inversa	TSL
503	Burseraceae	Crepidospermum goudotianum	TSL & BC
504	Burseraceae	Crepidospermum rhoifolium	TSL & BC
505	Burseraceae	Dacryodes belemensis	TSL
506	Burseraceae	Dacryodes chimantensis	TSL & BC
507	Burseraceae	Dacryodes glabra	TSL
508	Burseraceae	Dacryodes microcarpa	TSL & BC
509	Burseraceae	Dacryodes nitens	TSL & BC
510	Burseraceae	Dacryodes peruviana	BC
511	Burseraceae	Dacryodes roraimensis	BC
512	Burseraceae	Protium aidanianum	TSL
513	Burseraceae	Protium altsonii	TSL & BC
514	Burseraceae	Protium amazonicum	TSL & BC
515	Burseraceae	Protium apiculatum	TSL & BC
516	Burseraceae	Protium aracouchini	TSL & BC
517	Burseraceae	Protium calendulinum	BC
518	Burseraceae	Protium carnosum	BC
519	Burseraceae	Protium crassipetalum	TSL & BC
520	Burseraceae	Protium decandrum	TSL & BC
521	Burseraceae	Protium divaricatum	TSL & BC
522	Burseraceae	Protium ferrugineum	TSL & BC
523	Burseraceae	Protium giganteum	TSL & BC
524	Burseraceae	Protium glabrescens	TSL & BC
525	Burseraceae	Protium grandifolium	TSL & BC
526	Burseraceae	Protium guianense	TSL & BC
527	Burseraceae	Protium hebetatum	TSL & BC
528	Burseraceae	Protium heptaphyllum	TSL & BC
529	Burseraceae	Protium klugii	TSL
530	Burseraceae	Protium krukoffii	TSL
531	Burseraceae	Protium laxiflorum	BC
532	Burseraceae	Protium leptostachyum	BC
533	Burseraceae	Protium llanorum	TSL
534	Burseraceae	Protium meridionale	TSL
535	Burseraceae	Protium nitidifolium	TSL & BC
536	Burseraceae	Protium nodulosum	TSL & BC
537	Burseraceae	Protium opacum	TSL & BC
538	Burseraceae	Protium pallidum	TSL
539	Burseraceae	Protium paniculatum	BC
540	Burseraceae	Protium pilosellum	BC
541	Burseraceae	Protium pilosissimum	TSL & BC
542	Burseraceae	Protium pilosum	TSL & BC
543	Burseraceae	Protium plagiocarpium	BC
544	Burseraceae	Protium poeppigianum	TSL
545	Burseraceae	Protium polybotryum	TSL & BC
546	Burseraceae	Protium puncticulatum	BC
547	Burseraceae	Protium rhynchophyllum	BC
548	Burseraceae	Protium robustum	TSL & BC
549	Burseraceae	Protium rubrum	TSL & BC
550	Burseraceae	Protium sagotianum	TSL & BC
551	Burseraceae	Protium spruceanum	TSL & BC
552	Burseraceae	Protium strumosum	TSL & BC
553	Burseraceae	Protium subserratum	TSL & BC
554	Burseraceae	Protium tenuifolium	TSL & BC
555	Burseraceae	Protium trifoliolatum	TSL & BC
556	Burseraceae	Protium unifoliolatum	TSL
557	Burseraceae	Tetragastris altissima	TSL & BC
558	Burseraceae	Tetragastris panamensis	TSL & BC
559	Burseraceae	Trattinnickia boliviana	BC
560	Burseraceae	Trattinnickia burserifolia	TSL & BC
561	Burseraceae	Trattinnickia glaziovii	TSL & BC
562	Burseraceae	Trattinnickia rhoifolia	TSL & BC
563	Buxaceae	Styloceras brokawii	TSL
564	Calophyllaceae	Calophyllum angulare	TSL
565	Calophyllaceae	Calophyllum brasiliense	TSL & BC
566	Calophyllaceae	Calophyllum longifolium	TSL
567	Calophyllaceae	Calophyllum pachyphyllum	BC
568	Calophyllaceae	Caraipa ampla	BC
569	Calophyllaceae	Caraipa costata	TSL & BC
570	Calophyllaceae	Caraipa densifolia	TSL & BC
571	Calophyllaceae	Caraipa duckeana	TSL & BC
572	Calophyllaceae	Caraipa grandifolia	TSL & BC
573	Calophyllaceae	Caraipa heterocarpa	TSL & BC
574	Calophyllaceae	Caraipa llanorum	TSL
575	Calophyllaceae	Caraipa longipedicellata	TSL
576	Calophyllaceae	Caraipa minor	BC
577	Calophyllaceae	Caraipa multinervia	BC
578	Calophyllaceae	Caraipa odorata	BC
579	Calophyllaceae	Caraipa parvielliptica	TSL
580	Calophyllaceae	Caraipa punctulata	TSL & BC
581	Calophyllaceae	Caraipa racemosa	BC
582	Calophyllaceae	Caraipa richardiana	TSL & BC
583	Calophyllaceae	Caraipa savannarum	TSL & BC
584	Calophyllaceae	Caraipa spuria	BC
585	Calophyllaceae	Haploclathra leiantha	BC
586	Calophyllaceae	Haploclathra paniculata	TSL & BC
587	Calophyllaceae	Kielmeyera paniculata	TSL
588	Calophyllaceae	Kielmeyera rubriflora	TSL
589	Calophyllaceae	Mahurea exstipulata	TSL
590	Calophyllaceae	Marila alternifolia	TSL
591	Cannabaceae	Celtis loxensis	TSL
592	Cannabaceae	Celtis schippii	TSL
593	Cannabaceae	Trema micrantha	BC
594	Capparaceae	Capparidastrum coimbranum	TSL
595	Capparaceae	Capparidastrum osmanthum	TSL
596	Capparaceae	Capparidastrum petiolare	TSL
597	Capparaceae	Capparidastrum sola	TSL
598	Capparaceae	Capparidastrum solum	TSL
599	Capparaceae	Crateva tapia	TSL & BC
600	Capparaceae	Cynophalla amplissima	TSL
601	Capparaceae	Cynophalla flexuosa	BC
602	Capparaceae	Cynophalla polyantha	TSL
603	Capparaceae	Morisonia oblongifolia	BC
604	Cardiopteridaceae	Citronella melliodora	BC
605	Cardiopteridaceae	Dendrobangia boliviana	TSL & BC
606	Caricaceae	Jacaratia digitata	TSL & BC
607	Caricaceae	Jacaratia spinosa	TSL & BC
608	Caricaceae	Vasconcellea microcarpa	TSL & BC
609	Caryocaraceae	Anthodiscus amazonicus	BC
610	Caryocaraceae	Anthodiscus obovatus	TSL
611	Caryocaraceae	Caryocar amygdaliferum	TSL
612	Caryocaraceae	Caryocar edule	TSL
613	Caryocaraceae	Caryocar glabrum	TSL & BC
614	Caryocaraceae	Caryocar microcarpum	TSL & BC
615	Caryocaraceae	Caryocar pallidum	TSL
616	Caryocaraceae	Caryocar villosum	TSL & BC
617	Celastraceae	Cheiloclinium belizense	TSL
618	Celastraceae	Cheiloclinium cognatum	TSL
619	Celastraceae	Cheiloclinium hippocrateoides	TSL & BC
620	Celastraceae	Goniodiscus elaeospermus	BC
621	Celastraceae	Hippocratea volubilis	TSL
622	Celastraceae	Maytenus cardenasii	TSL
623	Celastraceae	Maytenus catingarum	TSL
624	Celastraceae	Maytenus ebenifolia	TSL & BC
625	Celastraceae	Maytenus guyanensis	TSL
626	Celastraceae	Maytenus krukovii	TSL
627	Celastraceae	Maytenus laevis	TSL
628	Celastraceae	Maytenus macrocarpa	TSL
629	Celastraceae	Maytenus myrsinoides	TSL & BC
630	Celastraceae	Maytenus obtusifolia	BC
631	Celastraceae	Peritassa dulcis	TSL & BC
632	Celastraceae	Peritassa laevigata	TSL & BC
633	Celastraceae	Prionostemma asperum	TSL
634	Celastraceae	Pristimera celastroides	BC
635	Celastraceae	Pristimera nervosa	TSL
636	Celastraceae	Salacia cordata	TSL & BC
637	Celastraceae	Salacia elliptica	TSL
638	Celastraceae	Salacia gigantea	TSL & BC
639	Celastraceae	Salacia impressifolia	TSL
640	Celastraceae	Salacia macrantha	TSL & BC
641	Celastraceae	Salacia miqueliana	TSL
642	Celastraceae	Salacia negrensis	BC
643	Celastraceae	Tontelea congestiflora	BC
644	Celastraceae	Tontelea mauritioides	BC
645	Celastraceae	Tontelea micrantha	TSL
646	Celastraceae	Tontelea passiflora	TSL
647	Chloranthaceae	Hedyosmum brasiliense	BC
648	Chrysobalanaceae	Acioa edulis	TSL
649	Chrysobalanaceae	Acioa longipendula	TSL & BC
650	Chrysobalanaceae	Couepia bracteosa	TSL & BC
651	Chrysobalanaceae	Couepia cataractae	BC
652	Chrysobalanaceae	Couepia chrysocalyx	TSL & BC
653	Chrysobalanaceae	Couepia edulis	TSL
654	Chrysobalanaceae	Couepia eriantha	BC
655	Chrysobalanaceae	Couepia guianensis	TSL & BC
656	Chrysobalanaceae	Couepia habrantha	BC
657	Chrysobalanaceae	Couepia krukovii	TSL & BC
658	Chrysobalanaceae	Couepia latifolia	BC
659	Chrysobalanaceae	Couepia macrophylla	TSL & BC
660	Chrysobalanaceae	Couepia magnoliifolia	BC
661	Chrysobalanaceae	Couepia marleneae	BC
662	Chrysobalanaceae	Couepia morii	BC
663	Chrysobalanaceae	Couepia multiflora	BC
664	Chrysobalanaceae	Couepia obovata	BC
665	Chrysobalanaceae	Couepia paraensis	TSL & BC
666	Chrysobalanaceae	Couepia robusta	TSL & BC
667	Chrysobalanaceae	Couepia spicata	TSL
668	Chrysobalanaceae	Couepia subcordata	TSL & BC
669	Chrysobalanaceae	Couepia trapezioana	TSL
670	Chrysobalanaceae	Couepia uiti	BC
671	Chrysobalanaceae	Couepia ulei	BC
672	Chrysobalanaceae	Couepia williamsii	TSL & BC
673	Chrysobalanaceae	Exellodendron barbatum	TSL & BC
674	Chrysobalanaceae	Exellodendron coriaceum	TSL & BC
675	Chrysobalanaceae	Gaulettia canomensis	TSL & BC
676	Chrysobalanaceae	Gaulettia elata	TSL
677	Chrysobalanaceae	Gaulettia parillo	TSL & BC
678	Chrysobalanaceae	Gaulettia racemosa	BC
679	Chrysobalanaceae	Hirtella bicornis	TSL & BC
680	Chrysobalanaceae	Hirtella brachystachya	TSL
681	Chrysobalanaceae	Hirtella burchellii	TSL & BC
682	Chrysobalanaceae	Hirtella ciliata	BC
683	Chrysobalanaceae	Hirtella elongata	TSL
684	Chrysobalanaceae	Hirtella eriandra	TSL & BC
685	Chrysobalanaceae	Hirtella excelsa	TSL & BC
686	Chrysobalanaceae	Hirtella glandulosa	TSL & BC
687	Chrysobalanaceae	Hirtella gracilipes	TSL & BC
688	Chrysobalanaceae	Hirtella guainiae	TSL
689	Chrysobalanaceae	Hirtella hispidula	TSL & BC
690	Chrysobalanaceae	Hirtella latifolia	TSL
691	Chrysobalanaceae	Hirtella macrophylla	BC
692	Chrysobalanaceae	Hirtella physophora	TSL
693	Chrysobalanaceae	Hirtella racemosa	TSL & BC
694	Chrysobalanaceae	Hirtella rodriguesii	TSL & BC
695	Chrysobalanaceae	Hirtella schultesii	TSL & BC
696	Chrysobalanaceae	Hirtella sprucei	BC
697	Chrysobalanaceae	Hirtella suffulta	BC
698	Chrysobalanaceae	Hirtella tentaculata	TSL
699	Chrysobalanaceae	Hirtella tenuifolia	BC
700	Chrysobalanaceae	Hirtella triandra	TSL
701	Chrysobalanaceae	Licania adolphoduckei	TSL
702	Chrysobalanaceae	Licania alba	TSL
703	Chrysobalanaceae	Licania apetala	TSL & BC
704	Chrysobalanaceae	Licania arachnoidea	TSL
705	Chrysobalanaceae	Licania blackii	TSL
706	Chrysobalanaceae	Licania bracteata	TSL
707	Chrysobalanaceae	Licania brittoniana	TSL & BC
708	Chrysobalanaceae	Licania canescens	TSL & BC
709	Chrysobalanaceae	Licania caudata	TSL
710	Chrysobalanaceae	Licania coriacea	TSL & BC
711	Chrysobalanaceae	Licania cuyabenensis	TSL
712	Chrysobalanaceae	Licania densiflora	BC
713	Chrysobalanaceae	Licania discolor	TSL & BC
714	Chrysobalanaceae	Licania egleri	TSL & BC
715	Chrysobalanaceae	Licania elliptica	TSL & BC
716	Chrysobalanaceae	Licania gardneri	TSL
717	Chrysobalanaceae	Licania gracilipes	TSL
718	Chrysobalanaceae	Licania granvillei	BC
719	Chrysobalanaceae	Licania guianensis	TSL
720	Chrysobalanaceae	Licania harlingii	TSL & BC
721	Chrysobalanaceae	Licania heteromorpha	TSL & BC
722	Chrysobalanaceae	Licania hirsuta	TSL
723	Chrysobalanaceae	Licania hoehnei	TSL
724	Chrysobalanaceae	Licania hypoleuca	TSL & BC
725	Chrysobalanaceae	Licania impressa	TSL
726	Chrysobalanaceae	Licania incana	TSL
727	Chrysobalanaceae	Licania intrapetiolaris	TSL & BC
728	Chrysobalanaceae	Licania krukovii	TSL
729	Chrysobalanaceae	Licania kunthiana	TSL & BC
730	Chrysobalanaceae	Licania laevigata	TSL
731	Chrysobalanaceae	Licania lanceolata	BC
732	Chrysobalanaceae	Licania lata	TSL & BC
733	Chrysobalanaceae	Licania latifolia	TSL & BC
734	Chrysobalanaceae	Licania laxiflora	TSL
735	Chrysobalanaceae	Licania leptostachya	BC
736	Chrysobalanaceae	Licania licaniiflora	TSL & BC
737	Chrysobalanaceae	Licania longipedicellata	TSL & BC
738	Chrysobalanaceae	Licania longipetala	TSL & BC
739	Chrysobalanaceae	Licania longistyla	TSL & BC
740	Chrysobalanaceae	Licania macrocarpa	TSL
741	Chrysobalanaceae	Licania macrophylla	TSL & BC
742	Chrysobalanaceae	Licania membranacea	TSL & BC
743	Chrysobalanaceae	Licania micrantha	TSL & BC
744	Chrysobalanaceae	Licania minutiflora	BC
745	Chrysobalanaceae	Licania mollis	TSL & BC
746	Chrysobalanaceae	Licania nelsonii	BC
747	Chrysobalanaceae	Licania niloi	TSL
748	Chrysobalanaceae	Licania oblongifolia	TSL & BC
749	Chrysobalanaceae	Licania octandra	TSL & BC
750	Chrysobalanaceae	Licania orbicularis	BC
751	Chrysobalanaceae	Licania pallida	TSL & BC
752	Chrysobalanaceae	Licania parviflora	TSL & BC
753	Chrysobalanaceae	Licania parvifolia	TSL & BC
754	Chrysobalanaceae	Licania parvifructa	BC
755	Chrysobalanaceae	Licania persaudii	TSL
756	Chrysobalanaceae	Licania polita	TSL & BC
757	Chrysobalanaceae	Licania pyrifolia	TSL
758	Chrysobalanaceae	Licania reticulata	TSL & BC
759	Chrysobalanaceae	Licania rodriguesii	BC
760	Chrysobalanaceae	Licania sandwithii	TSL
761	Chrysobalanaceae	Licania sclerophylla	TSL & BC
762	Chrysobalanaceae	Licania silvae	TSL & BC
763	Chrysobalanaceae	Licania sprucei	TSL & BC
764	Chrysobalanaceae	Licania stewardii	BC
765	Chrysobalanaceae	Licania triandra	TSL & BC
766	Chrysobalanaceae	Licania unguiculata	TSL & BC
767	Chrysobalanaceae	Licania urceolaris	TSL & BC
768	Chrysobalanaceae	Licania vaupesiana	BC
769	Chrysobalanaceae	Licania velutina	TSL
770	Chrysobalanaceae	Parinari campestris	TSL
771	Chrysobalanaceae	Parinari cardiophylla	BC
772	Chrysobalanaceae	Parinari excelsa	TSL & BC
773	Chrysobalanaceae	Parinari klugii	TSL & BC
774	Chrysobalanaceae	Parinari montana	TSL & BC
775	Chrysobalanaceae	Parinari occidentalis	BC
776	Chrysobalanaceae	Parinari parilis	TSL
777	Chrysobalanaceae	Parinari parvifolia	TSL
778	Chrysobalanaceae	Parinari rodolphii	TSL & BC
779	Chrysobalanaceae	Parinari sprucei	TSL & BC
780	Clusiaceae	Chrysochlamys membranacea	BC
781	Clusiaceae	Chrysochlamys ulei	TSL
782	Clusiaceae	Chrysochlamys weberbaueri	BC
783	Clusiaceae	Clusia amazonica	TSL
784	Clusiaceae	Clusia candelabrum	TSL & BC
785	Clusiaceae	Clusia chiribiquetensis	TSL
786	Clusiaceae	Clusia columnaris	TSL & BC
787	Clusiaceae	Clusia drouetiana	BC
788	Clusiaceae	Clusia flavida	TSL & BC
789	Clusiaceae	Clusia fockeana	TSL & BC
790	Clusiaceae	Clusia grandiflora	TSL
791	Clusiaceae	Clusia huberi	BC
792	Clusiaceae	Clusia insignis	BC
793	Clusiaceae	Clusia liesneri	TSL
794	Clusiaceae	Clusia lopezii	TSL
795	Clusiaceae	Clusia loretensis	BC
796	Clusiaceae	Clusia microstemon	TSL
797	Clusiaceae	Clusia minor	TSL
798	Clusiaceae	Clusia nemorosa	TSL & BC
799	Clusiaceae	Clusia octandra	TSL & BC
800	Clusiaceae	Clusia palmicida	TSL
801	Clusiaceae	Clusia panapanari	TSL & BC
802	Clusiaceae	Clusia polysepala	BC
803	Clusiaceae	Clusia renggerioides	TSL & BC
804	Clusiaceae	Clusia schomburgkiana	TSL
805	Clusiaceae	Clusia scrobiculata	TSL & BC
806	Clusiaceae	Clusia spathulifolia	TSL & BC
807	Clusiaceae	Clusia weddelliana	BC
808	Clusiaceae	Decaphalangium peruvianum	TSL
809	Clusiaceae	Dystovomita brasiliensis	TSL
810	Clusiaceae	Garcinia benthamiana	BC
811	Clusiaceae	Garcinia gardneriana	TSL & BC
812	Clusiaceae	Garcinia intermedia	TSL
813	Clusiaceae	Garcinia macrophylla	TSL & BC
814	Clusiaceae	Garcinia madruno	TSL & BC
815	Clusiaceae	Lorostemon bombaciflorum	TSL
816	Clusiaceae	Moronobea coccinea	TSL & BC
817	Clusiaceae	Moronobea pulchra	TSL & BC
818	Clusiaceae	Moronobea riparia	BC
819	Clusiaceae	Platonia insignis	TSL & BC
820	Clusiaceae	Rheedia benthamiana	TSL
821	Clusiaceae	Rheedia brasiliensis	TSL
822	Clusiaceae	Rheedia floribunda	TSL
823	Clusiaceae	Symphonia globulifera	TSL & BC
824	Clusiaceae	Tovomita acutiflora	TSL & BC
825	Clusiaceae	Tovomita brasiliensis	TSL
826	Clusiaceae	Tovomita brevistaminea	TSL
827	Clusiaceae	Tovomita calophyllophylla	BC
828	Clusiaceae	Tovomita choisyana	TSL & BC
829	Clusiaceae	Tovomita clarkii	BC
830	Clusiaceae	Tovomita foldatsii	TSL
831	Clusiaceae	Tovomita grata	TSL
832	Clusiaceae	Tovomita krukovii	TSL & BC
833	Clusiaceae	Tovomita longifolia	TSL & BC
834	Clusiaceae	Tovomita macrophylla	TSL & BC
835	Clusiaceae	Tovomita obovata	TSL
836	Clusiaceae	Tovomita pyrifolia	TSL
837	Clusiaceae	Tovomita schomburgkii	TSL & BC
838	Clusiaceae	Tovomita secunda	BC
839	Clusiaceae	Tovomita speciosa	TSL
840	Clusiaceae	Tovomita spruceana	TSL & BC
841	Clusiaceae	Tovomita stergiosii	TSL
842	Clusiaceae	Tovomita stigmatosa	TSL & BC
843	Clusiaceae	Tovomita tenuiflora	TSL
844	Clusiaceae	Tovomita umbellata	TSL & BC
845	Clusiaceae	Tovomita weddelliana	TSL
846	Combretaceae	Buchenavia amazonia	TSL
847	Combretaceae	Buchenavia congesta	TSL & BC
848	Combretaceae	Buchenavia grandis	TSL & BC
849	Combretaceae	Buchenavia guianensis	TSL & BC
850	Combretaceae	Buchenavia macrophylla	TSL & BC
851	Combretaceae	Buchenavia ochroprumna	TSL & BC
852	Combretaceae	Buchenavia oxycarpa	TSL & BC
853	Combretaceae	Buchenavia parvifolia	TSL & BC
854	Combretaceae	Buchenavia reticulata	TSL & BC
855	Combretaceae	Buchenavia sericocarpa	BC
856	Combretaceae	Buchenavia suaveolens	TSL & BC
857	Combretaceae	Buchenavia tetraphylla	TSL & BC
858	Combretaceae	Buchenavia tomentosa	TSL & BC
859	Combretaceae	Buchenavia viridiflora	TSL & BC
860	Combretaceae	Combretum cacoucia	TSL
861	Combretaceae	Combretum frangulifolium	TSL
862	Combretaceae	Combretum laxum	TSL
863	Combretaceae	Combretum leprosum	TSL & BC
864	Combretaceae	Combretum llewelynii	TSL
865	Combretaceae	Combretum paraguariense	TSL
866	Combretaceae	Combretum rotundifolium	TSL
867	Combretaceae	Terminalia amazonia	TSL & BC
868	Combretaceae	Terminalia argentea	TSL & BC
869	Combretaceae	Terminalia crispialata	TSL & BC
870	Combretaceae	Terminalia dichotoma	TSL & BC
871	Combretaceae	Terminalia guyanensis	TSL & BC
872	Combretaceae	Terminalia lucida	BC
873	Combretaceae	Terminalia oblonga	TSL
874	Combretaceae	Terminalia quintalata	BC
875	Combretaceae	Terminalia triflora	TSL
876	Combretaceae	Terminalia virens	TSL & BC
877	Connaraceae	Connarus fasciculatus	TSL & BC
878	Connaraceae	Connarus incomptus	BC
879	Connaraceae	Connarus marlenei	BC
880	Connaraceae	Connarus martii	BC
881	Connaraceae	Connarus perrottetii	TSL & BC
882	Connaraceae	Connarus punctatus	TSL
883	Connaraceae	Connarus rigidus	TSL & BC
884	Connaraceae	Connarus ruber	TSL
885	Connaraceae	Connarus venezuelanus	TSL
886	Connaraceae	Rourea amazonica	TSL
887	Dichapetalaceae	Stephanopodium peruvianum	TSL
888	Dichapetalaceae	Tapura acreana	TSL
889	Dichapetalaceae	Tapura amazonica	TSL & BC
890	Dichapetalaceae	Tapura guianensis	TSL & BC
891	Dichapetalaceae	Tapura juruana	TSL & BC
892	Dichapetalaceae	Tapura lanceolata	TSL & BC
893	Dichapetalaceae	Tapura peruviana	TSL
894	Dichapetalaceae	Tapura singularis	TSL
895	Ebenaceae	Diospyros artanthifolia	TSL & BC
896	Ebenaceae	Diospyros bullata	TSL & BC
897	Ebenaceae	Diospyros capreifolia	TSL & BC
898	Ebenaceae	Diospyros carbonaria	TSL
899	Ebenaceae	Diospyros cavalcantei	TSL & BC
900	Ebenaceae	Diospyros cayennensis	BC
901	Ebenaceae	Diospyros duckei	TSL
902	Ebenaceae	Diospyros egleri	BC
903	Ebenaceae	Diospyros glomerata	TSL & BC
904	Ebenaceae	Diospyros guianensis	TSL & BC
905	Ebenaceae	Diospyros kondor	TSL & BC
906	Ebenaceae	Diospyros longifolia	BC
907	Ebenaceae	Diospyros manausensis	TSL
908	Ebenaceae	Diospyros poeppigiana	TSL & BC
909	Ebenaceae	Diospyros sericea	BC
910	Ebenaceae	Diospyros tetrandra	TSL
911	Ebenaceae	Diospyros vestita	TSL & BC
912	Ebenaceae	Lissocarpa benthamii	TSL
913	Elaeocarpaceae	Sloanea brachytepala	TSL
914	Elaeocarpaceae	Sloanea brevipes	TSL & BC
915	Elaeocarpaceae	Sloanea davidsei	TSL
916	Elaeocarpaceae	Sloanea duckei	TSL
917	Elaeocarpaceae	Sloanea eichleri	TSL & BC
918	Elaeocarpaceae	Sloanea erismoides	TSL
919	Elaeocarpaceae	Sloanea fendleriana	TSL
920	Elaeocarpaceae	Sloanea floribunda	TSL & BC
921	Elaeocarpaceae	Sloanea fragrans	TSL & BC
922	Elaeocarpaceae	Sloanea garckeana	TSL
923	Elaeocarpaceae	Sloanea grandiflora	TSL & BC
924	Elaeocarpaceae	Sloanea grandis	TSL
925	Elaeocarpaceae	Sloanea guianensis	TSL & BC
926	Elaeocarpaceae	Sloanea latifolia	TSL & BC
927	Elaeocarpaceae	Sloanea laurifolia	TSL & BC
928	Elaeocarpaceae	Sloanea laxiflora	TSL
929	Elaeocarpaceae	Sloanea longipes	TSL
930	Elaeocarpaceae	Sloanea meianthera	TSL
931	Elaeocarpaceae	Sloanea nitida	TSL & BC
932	Elaeocarpaceae	Sloanea obtusifolia	TSL
933	Elaeocarpaceae	Sloanea parviflora	TSL
934	Elaeocarpaceae	Sloanea porphyrocarpa	TSL
935	Elaeocarpaceae	Sloanea pubescens	TSL & BC
936	Elaeocarpaceae	Sloanea robusta	TSL
937	Elaeocarpaceae	Sloanea rufa	TSL & BC
938	Elaeocarpaceae	Sloanea schomburgkii	TSL
939	Elaeocarpaceae	Sloanea sinemariensis	BC
940	Elaeocarpaceae	Sloanea spathulata	TSL
941	Elaeocarpaceae	Sloanea synandra	TSL
942	Elaeocarpaceae	Sloanea terniflora	TSL & BC
943	Elaeocarpaceae	Sloanea tuerckheimii	BC
944	Elaeocarpaceae	Sloanea uniflora	BC
945	Erythroxylaceae	Erythroxylum anguifugum	TSL & BC
946	Erythroxylaceae	Erythroxylum barbatum	BC
947	Erythroxylaceae	Erythroxylum citrifolium	TSL & BC
948	Erythroxylaceae	Erythroxylum coca	TSL
949	Erythroxylaceae	Erythroxylum daphnites	TSL
950	Erythroxylaceae	Erythroxylum deciduum	BC
951	Erythroxylaceae	Erythroxylum gracilipes	BC
952	Erythroxylaceae	Erythroxylum havanense	BC
953	Erythroxylaceae	Erythroxylum impressum	TSL
954	Erythroxylaceae	Erythroxylum kapplerianum	TSL & BC
955	Erythroxylaceae	Erythroxylum ligustrinum	BC
956	Erythroxylaceae	Erythroxylum loretense	BC
957	Erythroxylaceae	Erythroxylum macrophyllum	TSL & BC
958	Erythroxylaceae	Erythroxylum mucronatum	TSL & BC
959	Erythroxylaceae	Erythroxylum rufum	BC
960	Erythroxylaceae	Erythroxylum spruceanum	TSL & BC
961	Erythroxylaceae	Erythroxylum squamatum	BC
962	Erythroxylaceae	Erythroxylum steyermarkii	TSL
963	Erythroxylaceae	Erythroxylum subracemosum	BC
964	Erythroxylaceae	Erythroxylum subrotundum	TSL
965	Erythroxylaceae	Erythroxylum tucuruiense	TSL
966	Erythroxylaceae	Erythroxylum ulei	BC
967	Euphorbiaceae	Acalypha cuneata	BC
968	Euphorbiaceae	Acalypha diversifolia	BC
969	Euphorbiaceae	Acalypha juruana	BC
970	Euphorbiaceae	Acalypha macrostachya	TSL
971	Euphorbiaceae	Acalypha stricta	TSL
972	Euphorbiaceae	Actinostemon amazonicus	TSL
973	Euphorbiaceae	Actinostemon concolor	BC
974	Euphorbiaceae	Adelia ricinella	TSL
975	Euphorbiaceae	Adenophaedra grandifolia	BC
976	Euphorbiaceae	Alchornea castaneifolia	TSL
977	Euphorbiaceae	Alchornea discolor	TSL & BC
978	Euphorbiaceae	Alchornea fluviatilis	TSL
979	Euphorbiaceae	Alchornea glandulosa	TSL & BC
980	Euphorbiaceae	Alchornea latifolia	TSL & BC
981	Euphorbiaceae	Alchornea triplinervia	TSL & BC
982	Euphorbiaceae	Alchorneopsis floribunda	TSL & BC
983	Euphorbiaceae	Anomalocalyx uleanus	TSL & BC
984	Euphorbiaceae	Aparisthmium cordatum	TSL & BC
985	Euphorbiaceae	Caryodendron amazonicum	BC
986	Euphorbiaceae	Chaetocarpus echinocarpus	BC
987	Euphorbiaceae	Chaetocarpus schomburgkianus	TSL & BC
988	Euphorbiaceae	Conceveiba guianensis	TSL & BC
989	Euphorbiaceae	Conceveiba martiana	TSL & BC
990	Euphorbiaceae	Croton cuneatus	TSL & BC
991	Euphorbiaceae	Croton diasii	TSL
992	Euphorbiaceae	Croton glandulosus	TSL
993	Euphorbiaceae	Croton lanjouwiansis	TSL
994	Euphorbiaceae	Croton lechleri	TSL & BC
995	Euphorbiaceae	Croton matourensis	TSL
996	Euphorbiaceae	Croton pachypodus	BC
997	Euphorbiaceae	Croton palanostigma	BC
998	Euphorbiaceae	Croton pullei	TSL
999	Euphorbiaceae	Croton sacaquinha	BC
1000	Euphorbiaceae	Croton sampatik	BC
1001	Euphorbiaceae	Croton tessmannii	TSL
1002	Euphorbiaceae	Croton urucurana	BC
1003	Euphorbiaceae	Croton yavitensis	BC
1004	Euphorbiaceae	Dodecastigma integrifolium	BC
1005	Euphorbiaceae	Glycydendron amazonicum	TSL & BC
1006	Euphorbiaceae	Hevea benthamiana	TSL & BC
1007	Euphorbiaceae	Hevea brasiliensis	TSL & BC
1008	Euphorbiaceae	Hevea camargoana	TSL & BC
1009	Euphorbiaceae	Hevea guianensis	TSL & BC
1010	Euphorbiaceae	Hevea microphylla	BC
1011	Euphorbiaceae	Hevea nitida	TSL
1012	Euphorbiaceae	Hevea paludosa	BC
1013	Euphorbiaceae	Hevea pauciflora	TSL & BC
1014	Euphorbiaceae	Hevea spruceana	TSL & BC
1015	Euphorbiaceae	Hura crepitans	TSL & BC
1016	Euphorbiaceae	Mabea anadena	TSL & BC
1017	Euphorbiaceae	Mabea angularis	TSL
1018	Euphorbiaceae	Mabea angustifolia	BC
1019	Euphorbiaceae	Mabea anomala	BC
1020	Euphorbiaceae	Mabea fistulifera	TSL & BC
1021	Euphorbiaceae	Mabea klugii	TSL
1022	Euphorbiaceae	Mabea macbridei	TSL
1023	Euphorbiaceae	Mabea nitida	TSL & BC
1024	Euphorbiaceae	Mabea occidentalis	TSL & BC
1025	Euphorbiaceae	Mabea paniculata	TSL & BC
1026	Euphorbiaceae	Mabea piriri	TSL & BC
1027	Euphorbiaceae	Mabea pohliana	TSL & BC
1028	Euphorbiaceae	Mabea pulcherrima	TSL
1029	Euphorbiaceae	Mabea speciosa	TSL & BC
1030	Euphorbiaceae	Mabea standleyi	BC
1031	Euphorbiaceae	Mabea subserrulata	BC
1032	Euphorbiaceae	Mabea subsessilis	TSL
1033	Euphorbiaceae	Mabea taquari	TSL
1034	Euphorbiaceae	Manihot anomala	BC
1035	Euphorbiaceae	Manihot brachyloba	TSL
1036	Euphorbiaceae	Manihot caerulescens	BC
1037	Euphorbiaceae	Manihot tripartita	TSL
1038	Euphorbiaceae	Maprounea amazonica	TSL & BC
1039	Euphorbiaceae	Maprounea brasiliensis	BC
1040	Euphorbiaceae	Maprounea guianensis	TSL & BC
1041	Euphorbiaceae	Micrandra inundata	TSL & BC
1042	Euphorbiaceae	Micrandra minor	TSL & BC
1043	Euphorbiaceae	Micrandra siphonioides	TSL & BC
1044	Euphorbiaceae	Micrandra spruceana	TSL & BC
1045	Euphorbiaceae	Micrandra sprucei	TSL
1046	Euphorbiaceae	Micrandropsis scleroxylon	BC
1047	Euphorbiaceae	Nealchornea yapurensis	TSL & BC
1048	Euphorbiaceae	Omphalea diandra	TSL
1049	Euphorbiaceae	Pausandra fordii	BC
1050	Euphorbiaceae	Pausandra macropetala	BC
1051	Euphorbiaceae	Pausandra trianae	TSL
1052	Euphorbiaceae	Pera barbinervis	TSL
1053	Euphorbiaceae	Pera benensis	BC
1054	Euphorbiaceae	Pera bicolor	TSL & BC
1055	Euphorbiaceae	Pera coccinea	TSL & BC
1056	Euphorbiaceae	Pera decipiens	TSL & BC
1057	Euphorbiaceae	Pera distichophylla	TSL
1058	Euphorbiaceae	Pera eiteniorum	BC
1059	Euphorbiaceae	Pera glabrata	TSL & BC
1060	Euphorbiaceae	Pera obovata	TSL
1061	Euphorbiaceae	Pera pulchrifolia	TSL
1062	Euphorbiaceae	Pera tomentosa	TSL & BC
1063	Euphorbiaceae	Pleradenophora membranifolia	BC
1064	Euphorbiaceae	Pogonophora schomburgkiana	TSL
1065	Euphorbiaceae	Rhodothyrsus macrophyllus	TSL & BC
1066	Euphorbiaceae	Sagotia brachysepala	BC
1067	Euphorbiaceae	Sagotia racemosa	TSL & BC
1068	Euphorbiaceae	Sandwithia guyanensis	TSL & BC
1069	Euphorbiaceae	Sapium ciliatum	TSL
1070	Euphorbiaceae	Sapium glandulosum	TSL & BC
1071	Euphorbiaceae	Sapium jenmanii	TSL
1072	Euphorbiaceae	Sapium laurifolium	TSL & BC
1073	Euphorbiaceae	Sapium marmieri	TSL & BC
1074	Euphorbiaceae	Sapium obovatum	TSL
1075	Euphorbiaceae	Sapium pallidum	BC
1076	Euphorbiaceae	Sebastiania brasiliensis	TSL
1077	Euphorbiaceae	Senefeldera macrophylla	TSL
1078	Euphorbiaceae	Tetrorchidium macrophyllum	BC
1079	Euphorbiaceae	Tournesol tinctoria	TSL
1080	Euphorbiaceae	Vaupesia cataractarum	TSL
1081	Euphroniaceae	Euphronia guianensis	TSL
1082	Euphroniaceae	Euphronia hirtelloides	BC
1083	Gentianaceae	Potalia amara	BC
1084	Gentianaceae	Potalia coronata	BC
1085	Gentianaceae	Potalia maguireorum	BC
1086	Gentianaceae	Potalia resinifera	BC
1087	Gentianaceae	Tachia grandiflora	BC
1088	Goupiaceae	Goupia glabra	TSL & BC
1089	Hernandiaceae	Hernandia guianensis	TSL
1090	Humiriaceae	Duckesia verrucosa	BC
1091	Humiriaceae	Endopleura uchi	BC
1092	Humiriaceae	Humiria balsamifera	TSL & BC
1093	Humiriaceae	Humiriastrum cuspidatum	TSL & BC
1094	Humiriaceae	Humiriastrum excelsum	TSL
1095	Humiriaceae	Humiriastrum obovatum	TSL
1096	Humiriaceae	Humiriastrum piraparanense	TSL & BC
1097	Humiriaceae	Hylocarpa heterocarpa	TSL
1098	Humiriaceae	Sacoglottis amazonica	TSL & BC
1099	Humiriaceae	Sacoglottis ceratocarpa	TSL & BC
1100	Humiriaceae	Sacoglottis guianensis	TSL & BC
1101	Humiriaceae	Sacoglottis mattogrossensis	TSL & BC
1102	Humiriaceae	Schistostemon dichotomum	BC
1103	Humiriaceae	Schistostemon macrophyllum	TSL & BC
1104	Humiriaceae	Schistostemon oblongifolium	TSL & BC
1105	Humiriaceae	Schistostemon retusum	TSL & BC
1106	Humiriaceae	Vantanea deniseae	BC
1107	Humiriaceae	Vantanea guianensis	TSL & BC
1108	Humiriaceae	Vantanea macrocarpa	TSL
1109	Humiriaceae	Vantanea micrantha	TSL
1110	Humiriaceae	Vantanea paraensis	TSL & BC
1111	Humiriaceae	Vantanea parviflora	TSL & BC
1112	Hypericaceae	Vismia baccifera	TSL & BC
1113	Hypericaceae	Vismia cauliflora	BC
1114	Hypericaceae	Vismia cayennensis	TSL & BC
1115	Hypericaceae	Vismia confertiflora	TSL & BC
1116	Hypericaceae	Vismia gracilis	TSL & BC
1117	Hypericaceae	Vismia guianensis	TSL & BC
1118	Hypericaceae	Vismia japurensis	TSL & BC
1119	Hypericaceae	Vismia latifolia	BC
1120	Hypericaceae	Vismia laxiflora	BC
1121	Hypericaceae	Vismia macrophylla	TSL & BC
1122	Hypericaceae	Vismia obtusa	BC
1123	Hypericaceae	Vismia ramuliflora	BC
1124	Hypericaceae	Vismia sandwithii	TSL & BC
1125	Hypericaceae	Vismia schultesii	BC
1126	Hypericaceae	Vismia sprucei	TSL & BC
1127	Hypericaceae	Vismia tenuinervia	BC
1128	Ixonanthaceae	Cyrillopsis paraensis	TSL
1129	Ixonanthaceae	Ochthocosmus barrae	TSL & BC
1130	Ixonanthaceae	Ochthocosmus multiflorus	TSL
1131	Lacistemataceae	Lacistema aggregatum	TSL
1132	Lacistemataceae	Lacistema grandifolium	TSL & BC
1133	Lacistemataceae	Lacistema nena	TSL
1134	Lacistemataceae	Lacistema polystachyum	TSL & BC
1135	Lacistemataceae	Lacistema pubescens	BC
1136	Lamiaceae	Aegiphila bracteolosa	BC
1137	Lamiaceae	Aegiphila martinicensis	BC
1138	Lamiaceae	Aegiphila membranacea	BC
1139	Lamiaceae	Aegiphila verticillata	BC
1140	Lamiaceae	Vitex calothyrsa	BC
1141	Lamiaceae	Vitex capitata	BC
1142	Lamiaceae	Vitex compressa	BC
1143	Lamiaceae	Vitex cymosa	BC
1144	Lamiaceae	Vitex krukovii	BC
1145	Lamiaceae	Vitex orinocensis	BC
1146	Lamiaceae	Vitex polygama	BC
1147	Lamiaceae	Vitex pseudolea	BC
1148	Lamiaceae	Vitex spongiocarpa	BC
1149	Lamiaceae	Vitex triflora	BC
1150	Lauraceae	Aiouea laevis	BC
1151	Lauraceae	Aiouea saligna	TSL & BC
1152	Lauraceae	Aiouea tomentella	BC
1153	Lauraceae	Anaueria brasiliensis	BC
1154	Lauraceae	Aniba affinis	TSL & BC
1155	Lauraceae	Aniba burchellii	TSL & BC
1156	Lauraceae	Aniba canelilla	TSL & BC
1157	Lauraceae	Aniba citrifolia	BC
1158	Lauraceae	Aniba cylindriflora	BC
1159	Lauraceae	Aniba ferrea	TSL
1160	Lauraceae	Aniba guianensis	TSL & BC
1161	Lauraceae	Aniba hostmanniana	TSL & BC
1162	Lauraceae	Aniba jenmanii	TSL
1163	Lauraceae	Aniba kappleri	TSL
1164	Lauraceae	Aniba megaphylla	TSL
1165	Lauraceae	Aniba muca	BC
1166	Lauraceae	Aniba panurensis	TSL & BC
1167	Lauraceae	Aniba parviflora	TSL & BC
1168	Lauraceae	Aniba puchury-minor	BC
1169	Lauraceae	Aniba riparia	TSL & BC
1170	Lauraceae	Aniba santalodora	TSL & BC
1171	Lauraceae	Aniba taubertiana	BC
1172	Lauraceae	Aniba terminalis	TSL & BC
1173	Lauraceae	Aniba williamsii	TSL & BC
1174	Lauraceae	Beilschmiedia tovarensis	TSL
1175	Lauraceae	Caryodaphnopsis fosteri	BC
1176	Lauraceae	Caryodaphnopsis inaequalis	BC
1177	Lauraceae	Cinnamomum napoense	TSL
1178	Lauraceae	Cryptocarya guianensis	BC
1179	Lauraceae	Dicypellium manausense	TSL
1180	Lauraceae	Endlicheria acuminata	BC
1181	Lauraceae	Endlicheria anomala	TSL & BC
1182	Lauraceae	Endlicheria arenosa	TSL
1183	Lauraceae	Endlicheria arunciflora	BC
1184	Lauraceae	Endlicheria bracteata	TSL & BC
1185	Lauraceae	Endlicheria bracteolata	TSL & BC
1186	Lauraceae	Endlicheria canescens	TSL
1187	Lauraceae	Endlicheria chalisea	TSL & BC
1188	Lauraceae	Endlicheria citriodora	TSL
1189	Lauraceae	Endlicheria dictifarinosa	BC
1190	Lauraceae	Endlicheria directonervia	TSL
1191	Lauraceae	Endlicheria dysodantha	BC
1192	Lauraceae	Endlicheria formosa	TSL & BC
1193	Lauraceae	Endlicheria krukovii	TSL & BC
1194	Lauraceae	Endlicheria levelii	BC
1195	Lauraceae	Endlicheria lorastemon	BC
1196	Lauraceae	Endlicheria macrophylla	TSL & BC
1197	Lauraceae	Endlicheria metallica	TSL
1198	Lauraceae	Endlicheria multiflora	TSL & BC
1199	Lauraceae	Endlicheria paniculata	TSL & BC
1200	Lauraceae	Endlicheria punctulata	TSL
1201	Lauraceae	Endlicheria pyriformis	BC
1202	Lauraceae	Endlicheria reflectens	BC
1203	Lauraceae	Endlicheria robusta	BC
1204	Lauraceae	Endlicheria rubra	BC
1205	Lauraceae	Endlicheria rubriflora	BC
1206	Lauraceae	Endlicheria ruforamula	TSL
1207	Lauraceae	Endlicheria sprucei	BC
1208	Lauraceae	Endlicheria szyszylowiczii	TSL & BC
1209	Lauraceae	Endlicheria verticillata	TSL & BC
1210	Lauraceae	Kubitzkia mezii	TSL & BC
1211	Lauraceae	Licaria armeniaca	TSL & BC
1212	Lauraceae	Licaria aurea	TSL & BC
1213	Lauraceae	Licaria brasiliensis	BC
1214	Lauraceae	Licaria camara	BC
1215	Lauraceae	Licaria canella	TSL
1216	Lauraceae	Licaria cannella	TSL
1217	Lauraceae	Licaria chrysophylla	TSL & BC
1218	Lauraceae	Licaria crassifolia	BC
1219	Lauraceae	Licaria debilis	BC
1220	Lauraceae	Licaria guianensis	TSL & BC
1221	Lauraceae	Licaria martiniana	TSL
1222	Lauraceae	Licaria oppositifolia	TSL
1223	Lauraceae	Licaria pachycarpa	TSL & BC
1224	Lauraceae	Licaria polyphylla	BC
1225	Lauraceae	Licaria puchury-major	BC
1226	Lauraceae	Licaria rodriguesii	TSL
1227	Lauraceae	Licaria subbullata	BC
1228	Lauraceae	Licaria triandra	TSL
1229	Lauraceae	Mezilaurus duckei	TSL
1230	Lauraceae	Mezilaurus itauba	TSL & BC
1231	Lauraceae	Mezilaurus lindaviana	BC
1232	Lauraceae	Mezilaurus mahuba	TSL & BC
1233	Lauraceae	Mezilaurus sprucei	BC
1234	Lauraceae	Nectandra acuminata	BC
1235	Lauraceae	Nectandra acutifolia	TSL
1236	Lauraceae	Nectandra amazonum	TSL & BC
1237	Lauraceae	Nectandra canescens	BC
1238	Lauraceae	Nectandra cissiflora	TSL & BC
1239	Lauraceae	Nectandra cuneatocordata	TSL
1240	Lauraceae	Nectandra cuspidata	TSL & BC
1241	Lauraceae	Nectandra egensis	BC
1242	Lauraceae	Nectandra embirensis	BC
1243	Lauraceae	Nectandra gardneri	TSL
1244	Lauraceae	Nectandra globosa	TSL & BC
1245	Lauraceae	Nectandra grisea	BC
1246	Lauraceae	Nectandra hihua	TSL & BC
1247	Lauraceae	Nectandra longifolia	TSL
1248	Lauraceae	Nectandra maynensis	BC
1249	Lauraceae	Nectandra membranacea	TSL
1250	Lauraceae	Nectandra microcarpa	BC
1251	Lauraceae	Nectandra paucinervia	TSL & BC
1252	Lauraceae	Nectandra pulverulenta	TSL & BC
1253	Lauraceae	Nectandra reticulata	BC
1254	Lauraceae	Nectandra riparia	BC
1255	Lauraceae	Ocotea aciphylla	TSL & BC
1256	Lauraceae	Ocotea amazonica	TSL & BC
1257	Lauraceae	Ocotea argyrophylla	BC
1258	Lauraceae	Ocotea bofo	TSL
1259	Lauraceae	Ocotea boissieriana	TSL
1260	Lauraceae	Ocotea camphoromoea	BC
1261	Lauraceae	Ocotea canaliculata	TSL & BC
1262	Lauraceae	Ocotea cernua	TSL
1263	Lauraceae	Ocotea cinerea	TSL & BC
1264	Lauraceae	Ocotea costulata	TSL & BC
1265	Lauraceae	Ocotea cujumary	TSL & BC
1266	Lauraceae	Ocotea cymbarum	TSL & BC
1267	Lauraceae	Ocotea delicata	TSL
1268	Lauraceae	Ocotea esmeraldana	TSL
1269	Lauraceae	Ocotea floribunda	TSL & BC
1270	Lauraceae	Ocotea glomerata	BC
1271	Lauraceae	Ocotea gracilis	TSL
1272	Lauraceae	Ocotea guianensis	TSL & BC
1273	Lauraceae	Ocotea immersa	TSL
1274	Lauraceae	Ocotea javitensis	TSL
1275	Lauraceae	Ocotea leucoxylon	TSL & BC
1276	Lauraceae	Ocotea ligulata	BC
1277	Lauraceae	Ocotea longifolia	TSL
1278	Lauraceae	Ocotea marmellensis	BC
1279	Lauraceae	Ocotea mascarena	TSL
1280	Lauraceae	Ocotea matogrossensis	TSL & BC
1281	Lauraceae	Ocotea megacarpa	TSL
1282	Lauraceae	Ocotea meziana	TSL
1283	Lauraceae	Ocotea myriantha	TSL & BC
1284	Lauraceae	Ocotea neblinae	TSL
1285	Lauraceae	Ocotea neesiana	TSL & BC
1286	Lauraceae	Ocotea nigrescens	TSL & BC
1287	Lauraceae	Ocotea nitida	TSL
1288	Lauraceae	Ocotea obliqua	BC
1289	Lauraceae	Ocotea oblonga	BC
1290	Lauraceae	Ocotea odorifera	TSL
1291	Lauraceae	Ocotea olivacea	TSL
1292	Lauraceae	Ocotea pauciflora	TSL & BC
1293	Lauraceae	Ocotea percurrens	TSL & BC
1294	Lauraceae	Ocotea petalanthera	TSL
1295	Lauraceae	Ocotea puberula	TSL & BC
1296	Lauraceae	Ocotea quixos	TSL
1297	Lauraceae	Ocotea rubra	TSL
1298	Lauraceae	Ocotea scabrella	TSL & BC
1299	Lauraceae	Ocotea scandens	BC
1300	Lauraceae	Ocotea schomburgkiana	TSL
1301	Lauraceae	Ocotea splendens	TSL
1302	Lauraceae	Ocotea subterminalis	BC
1303	Lauraceae	Ocotea tabacifolia	TSL
1304	Lauraceae	Ocotea tenella	BC
1305	Lauraceae	Ocotea tomentella	BC
1306	Lauraceae	Paraia bracteata	TSL & BC
1307	Lauraceae	Persea pseudofasciculata	TSL
1308	Lauraceae	Pleurothyrium cuneifolium	BC
1309	Lauraceae	Pleurothyrium intermedium	BC
1310	Lauraceae	Pleurothyrium nobile	BC
1311	Lauraceae	Pleurothyrium panurense	BC
1312	Lauraceae	Pleurothyrium parviflorum	TSL & BC
1313	Lauraceae	Pleurothyrium poeppigii	TSL & BC
1314	Lauraceae	Pleurothyrium prancei	BC
1315	Lauraceae	Pleurothyrium vasquezii	BC
1316	Lauraceae	Pleurothyrium williamsii	TSL
1317	Lauraceae	Rhodostemonodaphne crenaticupula	BC
1318	Lauraceae	Rhodostemonodaphne grandis	TSL
1319	Lauraceae	Rhodostemonodaphne kunthiana	TSL & BC
1320	Lauraceae	Rhodostemonodaphne negrensis	TSL
1321	Lauraceae	Rhodostemonodaphne peneia	TSL & BC
1322	Lauraceae	Rhodostemonodaphne praeclara	TSL
1323	Lauraceae	Rhodostemonodaphne recurva	TSL
1324	Lauraceae	Williamodendron spectabile	TSL
1325	Lecythidaceae	Allantoma decandra	TSL & BC
1326	Lecythidaceae	Allantoma integrifolia	BC
1327	Lecythidaceae	Allantoma lineata	TSL & BC
1328	Lecythidaceae	Asteranthos brasiliensis	BC
1329	Lecythidaceae	Bertholletia excelsa	TSL & BC
1330	Lecythidaceae	Cariniana decandra	TSL
1331	Lecythidaceae	Cariniana domestica	TSL & BC
1332	Lecythidaceae	Cariniana estrellensis	TSL
1333	Lecythidaceae	Cariniana integrifolia	TSL
1334	Lecythidaceae	Cariniana micrantha	TSL & BC
1335	Lecythidaceae	Cariniana rubra	TSL
1336	Lecythidaceae	Corythophora alta	BC
1337	Lecythidaceae	Corythophora rimosa	BC
1338	Lecythidaceae	Couratari guianensis	TSL & BC
1339	Lecythidaceae	Couratari longipedicellata	TSL
1340	Lecythidaceae	Couratari macrosperma	TSL & BC
1341	Lecythidaceae	Couratari multiflora	TSL & BC
1342	Lecythidaceae	Couratari oblongifolia	BC
1343	Lecythidaceae	Couratari oligantha	TSL & BC
1344	Lecythidaceae	Couratari riparia	TSL
1345	Lecythidaceae	Couratari stellata	BC
1346	Lecythidaceae	Couratari tauari	TSL & BC
1347	Lecythidaceae	Couratari tenuicarpa	TSL & BC
1348	Lecythidaceae	Couroupita guianensis	TSL & BC
1349	Lecythidaceae	Couroupita subsessilis	TSL & BC
1350	Lecythidaceae	Eschweilera albiflora	TSL & BC
1351	Lecythidaceae	Eschweilera amazonica	TSL & BC
1352	Lecythidaceae	Eschweilera amazoniciformis	TSL & BC
1353	Lecythidaceae	Eschweilera andina	TSL
1354	Lecythidaceae	Eschweilera apiculata	BC
1355	Lecythidaceae	Eschweilera atropetiolata	TSL & BC
1356	Lecythidaceae	Eschweilera bracteosa	TSL & BC
1357	Lecythidaceae	Eschweilera carinata	TSL
1358	Lecythidaceae	Eschweilera chartaceifolia	TSL
1359	Lecythidaceae	Eschweilera collina	TSL & BC
1360	Lecythidaceae	Eschweilera coriacea	TSL & BC
1361	Lecythidaceae	Eschweilera cyathiformis	BC
1362	Lecythidaceae	Eschweilera decolorans	TSL
1363	Lecythidaceae	Eschweilera gigantea	TSL & BC
1364	Lecythidaceae	Eschweilera grandiflora	TSL & BC
1365	Lecythidaceae	Eschweilera integrifolia	TSL
1366	Lecythidaceae	Eschweilera itayensis	TSL & BC
1367	Lecythidaceae	Eschweilera juruensis	TSL & BC
1368	Lecythidaceae	Eschweilera laevicarpa	BC
1369	Lecythidaceae	Eschweilera micrantha	BC
1370	Lecythidaceae	Eschweilera obversa	BC
1371	Lecythidaceae	Eschweilera ovalifolia	TSL & BC
1372	Lecythidaceae	Eschweilera ovata	TSL & BC
1373	Lecythidaceae	Eschweilera paniculata	TSL
1374	Lecythidaceae	Eschweilera parviflora	TSL & BC
1375	Lecythidaceae	Eschweilera parvifolia	TSL & BC
1376	Lecythidaceae	Eschweilera pedicellata	TSL & BC
1377	Lecythidaceae	Eschweilera piresii	TSL & BC
1378	Lecythidaceae	Eschweilera pseudodecolorans	TSL & BC
1379	Lecythidaceae	Eschweilera rankiniae	BC
1380	Lecythidaceae	Eschweilera revoluta	TSL
1381	Lecythidaceae	Eschweilera rhododendrifolia	TSL
1382	Lecythidaceae	Eschweilera romeu-cardosoi	BC
1383	Lecythidaceae	Eschweilera rufifolia	TSL
1384	Lecythidaceae	Eschweilera sessilis	TSL
1385	Lecythidaceae	Eschweilera subglandulosa	TSL & BC
1386	Lecythidaceae	Eschweilera tenuifolia	TSL & BC
1387	Lecythidaceae	Eschweilera tessmannii	TSL & BC
1388	Lecythidaceae	Eschweilera truncata	TSL & BC
1389	Lecythidaceae	Eschweilera wachenheimii	TSL & BC
1390	Lecythidaceae	Grias neuberthii	TSL
1391	Lecythidaceae	Gustavia augusta	TSL & BC
1392	Lecythidaceae	Gustavia coriacea	TSL
1393	Lecythidaceae	Gustavia elliptica	TSL & BC
1394	Lecythidaceae	Gustavia hexapetala	TSL & BC
1395	Lecythidaceae	Gustavia longifolia	TSL & BC
1396	Lecythidaceae	Gustavia poeppigiana	TSL
1397	Lecythidaceae	Gustavia pulchra	TSL & BC
1398	Lecythidaceae	Lecythis alutacea	BC
1399	Lecythidaceae	Lecythis barnebyi	TSL & BC
1400	Lecythidaceae	Lecythis chartacea	TSL & BC
1401	Lecythidaceae	Lecythis confertiflora	BC
1402	Lecythidaceae	Lecythis corrugata	TSL & BC
1403	Lecythidaceae	Lecythis gracieana	TSL & BC
1404	Lecythidaceae	Lecythis idatimon	TSL
1405	Lecythidaceae	Lecythis lurida	TSL
1406	Lecythidaceae	Lecythis parvifructa	BC
1407	Lecythidaceae	Lecythis pisonis	TSL & BC
1408	Lecythidaceae	Lecythis poiteaui	TSL & BC
1409	Lecythidaceae	Lecythis prancei	TSL & BC
1410	Lecythidaceae	Lecythis retusa	BC
1411	Lecythidaceae	Lecythis schomburgkii	BC
1412	Lecythidaceae	Lecythis serrata	BC
1413	Lecythidaceae	Lecythis zabucajo	TSL & BC
1414	Leguminosae	Abarema adenophora	TSL
1415	Leguminosae	Abarema auriculata	BC
1416	Leguminosae	Abarema barbouriana	BC
1417	Leguminosae	Abarema cochleata	TSL & BC
1418	Leguminosae	Abarema floribunda	TSL & BC
1419	Leguminosae	Abarema jupunba	TSL & BC
1420	Leguminosae	Abarema laeta	BC
1421	Leguminosae	Abarema leucophylla	TSL
1422	Leguminosae	Abarema levelii	BC
1423	Leguminosae	Abarema longipedunculata	TSL & BC
1424	Leguminosae	Abarema mataybifolia	TSL
1425	Leguminosae	Abarema microcalyx	BC
1426	Leguminosae	Abarema piresii	TSL & BC
1427	Leguminosae	Acacia kuhlmannii	TSL
1428	Leguminosae	Albizia glabripetala	BC
1429	Leguminosae	Albizia multiflora	TSL & BC
1430	Leguminosae	Albizia niopoides	TSL & BC
1431	Leguminosae	Albizia pedicellaris	TSL
1432	Leguminosae	Albizia subdimidiata	TSL & BC
1433	Leguminosae	Aldina heterophylla	TSL & BC
1434	Leguminosae	Aldina insignis	TSL
1435	Leguminosae	Aldina kunhardtiana	TSL
1436	Leguminosae	Aldina latifolia	TSL & BC
1437	Leguminosae	Aldina macrophylla	TSL
1438	Leguminosae	Alexa bauhiniiflora	BC
1439	Leguminosae	Alexa grandiflora	TSL & BC
1440	Leguminosae	Alexa imperatricis	TSL & BC
1441	Leguminosae	Alexa superba	BC
1442	Leguminosae	Amburana cearensis	TSL
1443	Leguminosae	Amphiodon effusus	TSL & BC
1444	Leguminosae	Anadenanthera peregrina	BC
1445	Leguminosae	Andira inermis	TSL & BC
1446	Leguminosae	Andira macrocarpa	TSL
1447	Leguminosae	Andira macrothyrsa	TSL & BC
1448	Leguminosae	Andira micrantha	TSL
1449	Leguminosae	Andira multistipula	TSL & BC
1450	Leguminosae	Andira parviflora	TSL & BC
1451	Leguminosae	Andira surinamensis	TSL & BC
1452	Leguminosae	Andira trifoliolata	TSL & BC
1453	Leguminosae	Andira unifoliolata	TSL & BC
1454	Leguminosae	Andira vermifuga	TSL
1455	Leguminosae	Apuleia leiocarpa	TSL & BC
1456	Leguminosae	Barnebydendron riedelii	TSL
1457	Leguminosae	Batesia floribunda	TSL & BC
1458	Leguminosae	Bauhinia acreana	BC
1459	Leguminosae	Bauhinia bombaciflora	BC
1460	Leguminosae	Bauhinia brachycalyx	TSL
1461	Leguminosae	Bauhinia cupulata	BC
1462	Leguminosae	Bauhinia forficata	TSL
1463	Leguminosae	Bauhinia glabra	TSL
1464	Leguminosae	Bauhinia guianensis	TSL
1465	Leguminosae	Bauhinia longicuspis	BC
1466	Leguminosae	Bauhinia rutilans	TSL
1467	Leguminosae	Bauhinia splendens	TSL
1468	Leguminosae	Bauhinia tarapotensis	TSL & BC
1469	Leguminosae	Bauhinia ungulata	TSL & BC
1470	Leguminosae	Bocoa viridiflora	BC
1471	Leguminosae	Bowdichia nitida	TSL
1472	Leguminosae	Bowdichia virgilioides	TSL
1473	Leguminosae	Brownea coccinea	TSL
1474	Leguminosae	Brownea grandiceps	TSL
1475	Leguminosae	Brownea longipedicellata	BC
1476	Leguminosae	Brownea macrophylla	TSL
1477	Leguminosae	Browneopsis cauliflora	TSL
1478	Leguminosae	Browneopsis excelsa	BC
1479	Leguminosae	Calliandra laxa	BC
1480	Leguminosae	Calliandra surinamensis	TSL
1481	Leguminosae	Calliandra tergemina	TSL
1482	Leguminosae	Calliandra trinervia	BC
1483	Leguminosae	Campsiandra angustifolia	TSL & BC
1484	Leguminosae	Campsiandra chigo-montero	BC
1485	Leguminosae	Campsiandra comosa	TSL & BC
1486	Leguminosae	Campsiandra gomez-alvareziana	BC
1487	Leguminosae	Campsiandra implexicaulis	TSL & BC
1488	Leguminosae	Campsiandra laurifolia	TSL & BC
1489	Leguminosae	Campsiandra macrocarpa	TSL
1490	Leguminosae	Campsiandra taphornii	TSL
1491	Leguminosae	Campsiandra wurdackiana	TSL
1492	Leguminosae	Cassia cowanii	TSL
1493	Leguminosae	Cassia fastuosa	BC
1494	Leguminosae	Cassia grandis	TSL & BC
1495	Leguminosae	Cassia leiandra	TSL & BC
1496	Leguminosae	Cassia midas	BC
1497	Leguminosae	Cassia moschata	BC
1498	Leguminosae	Cassia spruceana	TSL & BC
1499	Leguminosae	Cassia swartzioides	BC
1500	Leguminosae	Cedrelinga cateniformis	TSL & BC
1501	Leguminosae	Cenostigma macrophyllum	TSL
1502	Leguminosae	Cenostigma tocantinum	BC
1503	Leguminosae	Chamaecrista adiantifolia	TSL & BC
1504	Leguminosae	Chamaecrista bahiae	TSL
1505	Leguminosae	Chamaecrista negrensis	TSL & BC
1506	Leguminosae	Chamaecrista polystachya	BC
1507	Leguminosae	Chamaecrista xinguensis	TSL
1508	Leguminosae	Chloroleucon acacioides	BC
1509	Leguminosae	Clathrotropis brachypetala	TSL
1510	Leguminosae	Clathrotropis macrocarpa	TSL
1511	Leguminosae	Clathrotropis nitida	TSL & BC
1512	Leguminosae	Clitoria amazonum	TSL
1513	Leguminosae	Clitoria arborea	BC
1514	Leguminosae	Clitoria fairchildiana	BC
1515	Leguminosae	Clitoria leptostachya	TSL
1516	Leguminosae	Copaifera glycycarpa	BC
1517	Leguminosae	Copaifera guyanensis	BC
1518	Leguminosae	Copaifera langsdorffii	TSL & BC
1519	Leguminosae	Copaifera langsdorfii	TSL
1520	Leguminosae	Copaifera martii	BC
1521	Leguminosae	Copaifera multijuga	TSL & BC
1522	Leguminosae	Copaifera officinalis	TSL
1523	Leguminosae	Copaifera pubiflora	BC
1524	Leguminosae	Copaifera reticulata	TSL & BC
1525	Leguminosae	Coursetia ferruginea	TSL & BC
1526	Leguminosae	Crudia aequalis	BC
1527	Leguminosae	Crudia amazonica	TSL & BC
1528	Leguminosae	Crudia bracteata	TSL & BC
1529	Leguminosae	Crudia glaberrima	TSL & BC
1530	Leguminosae	Crudia oblonga	TSL & BC
1531	Leguminosae	Cynometra bauhiniifolia	TSL & BC
1532	Leguminosae	Cynometra cuneata	TSL & BC
1533	Leguminosae	Cynometra duckei	BC
1534	Leguminosae	Cynometra hostmanniana	TSL & BC
1535	Leguminosae	Cynometra longicuspis	TSL & BC
1536	Leguminosae	Cynometra marginata	TSL & BC
1537	Leguminosae	Cynometra parvifolia	BC
1538	Leguminosae	Cynometra spruceana	BC
1539	Leguminosae	Dalbergia frutescens	TSL
1540	Leguminosae	Dalbergia gracilis	TSL
1541	Leguminosae	Dalbergia inundata	TSL
1542	Leguminosae	Dalbergia ovalis	TSL & BC
1543	Leguminosae	Deguelia amazonica	TSL
1544	Leguminosae	Deguelia utilis	TSL
1545	Leguminosae	Dialium guianense	TSL & BC
1546	Leguminosae	Dicorynia paraensis	TSL & BC
1547	Leguminosae	Dicymbe pharangophila	TSL
1548	Leguminosae	Dimorphandra coccinea	BC
1549	Leguminosae	Dimorphandra cuprea	BC
1550	Leguminosae	Dimorphandra ignea	BC
1551	Leguminosae	Dimorphandra macrostachya	TSL & BC
1552	Leguminosae	Dimorphandra parviflora	TSL & BC
1553	Leguminosae	Dimorphandra pennigera	TSL & BC
1554	Leguminosae	Dimorphandra unijuga	TSL & BC
1555	Leguminosae	Dimorphandra urubuensis	BC
1556	Leguminosae	Dimorphandra vernicosa	BC
1557	Leguminosae	Dinizia excelsa	BC
1558	Leguminosae	Dioclea huberi	TSL
1559	Leguminosae	Dioclea scabra	TSL
1560	Leguminosae	Diplotropis brasiliensis	BC
1561	Leguminosae	Diplotropis martiusii	TSL & BC
1562	Leguminosae	Diplotropis purpurea	TSL & BC
1563	Leguminosae	Diplotropis racemosa	TSL
1564	Leguminosae	Diplotropis triloba	TSL
1565	Leguminosae	Dipteryx alata	TSL
1566	Leguminosae	Dipteryx ferrea	BC
1567	Leguminosae	Dipteryx magnifica	TSL & BC
1568	Leguminosae	Dipteryx micrantha	TSL & BC
1569	Leguminosae	Dipteryx odorata	TSL & BC
1570	Leguminosae	Dipteryx polyphylla	TSL
1571	Leguminosae	Dipteryx punctata	TSL & BC
1572	Leguminosae	Dipteryx rosea	BC
1573	Leguminosae	Elizabetha coccinea	BC
1574	Leguminosae	Elizabetha leiogyne	BC
1575	Leguminosae	Elizabetha paraensis	BC
1576	Leguminosae	Elizabetha princeps	BC
1577	Leguminosae	Entada polystachya	TSL & BC
1578	Leguminosae	Enterolobium contortisiliquum	TSL
1579	Leguminosae	Enterolobium cyclocarpum	TSL
1580	Leguminosae	Enterolobium maximum	TSL & BC
1581	Leguminosae	Enterolobium schomburgkii	TSL & BC
1582	Leguminosae	Eperua bijuga	TSL & BC
1583	Leguminosae	Eperua duckeana	BC
1584	Leguminosae	Eperua falcata	TSL
1585	Leguminosae	Eperua glabra	TSL
1586	Leguminosae	Eperua glabriflora	TSL & BC
1587	Leguminosae	Eperua jenmanii	BC
1588	Leguminosae	Eperua leucantha	TSL
1589	Leguminosae	Eperua praesagata	BC
1590	Leguminosae	Eperua purpurea	TSL
1591	Leguminosae	Eperua rubiginosa	TSL & BC
1592	Leguminosae	Eperua schomburgkiana	BC
1593	Leguminosae	Erythrina amazonica	TSL & BC
1594	Leguminosae	Erythrina fusca	TSL & BC
1595	Leguminosae	Erythrina ulei	TSL
1596	Leguminosae	Etaballia dubia	TSL & BC
1597	Leguminosae	Gilbertiodendron unijugum	TSL
1598	Leguminosae	Heterostemon conjugatus	BC
1599	Leguminosae	Heterostemon ellipticus	BC
1600	Leguminosae	Heterostemon impar	TSL
1601	Leguminosae	Heterostemon mimosoides	TSL & BC
1602	Leguminosae	Hydrochorea corymbosa	TSL & BC
1603	Leguminosae	Hydrochorea gonggrijpii	TSL
1604	Leguminosae	Hydrochorea marginata	TSL
1605	Leguminosae	Hymenaea courbaril	TSL & BC
1606	Leguminosae	Hymenaea intermedia	TSL & BC
1607	Leguminosae	Hymenaea oblongifolia	TSL & BC
1608	Leguminosae	Hymenaea parvifolia	TSL & BC
1609	Leguminosae	Hymenaea reticulata	BC
1610	Leguminosae	Hymenaea stigonocarpa	TSL
1611	Leguminosae	Hymenolobium excelsum	TSL
1612	Leguminosae	Hymenolobium heterocarpum	TSL & BC
1613	Leguminosae	Hymenolobium modestum	TSL
1614	Leguminosae	Hymenolobium petraeum	BC
1615	Leguminosae	Hymenolobium pulcherrimum	TSL
1616	Leguminosae	Hymenolobium sericeum	TSL
1617	Leguminosae	Inga acicularis	BC
1618	Leguminosae	Inga acreana	BC
1619	Leguminosae	Inga acuminata	TSL & BC
1620	Leguminosae	Inga adenophylla	TSL
1621	Leguminosae	Inga alba	TSL & BC
1622	Leguminosae	Inga auristellae	TSL & BC
1623	Leguminosae	Inga bicoloriflora	TSL
1624	Leguminosae	Inga bonplandiana	TSL
1625	Leguminosae	Inga bourgonii	TSL & BC
1626	Leguminosae	Inga brachyrhachis	TSL & BC
1627	Leguminosae	Inga calantha	BC
1628	Leguminosae	Inga capitata	TSL & BC
1629	Leguminosae	Inga cayennensis	TSL & BC
1630	Leguminosae	Inga cecropietorum	BC
1631	Leguminosae	Inga chartacea	TSL & BC
1632	Leguminosae	Inga chrysantha	TSL & BC
1633	Leguminosae	Inga ciliata	TSL
1634	Leguminosae	Inga cinnamomea	TSL & BC
1635	Leguminosae	Inga cordatoalata	TSL & BC
1636	Leguminosae	Inga coruscans	TSL & BC
1637	Leguminosae	Inga crassiflora	TSL
1638	Leguminosae	Inga cylindrica	BC
1639	Leguminosae	Inga densiflora	TSL
1640	Leguminosae	Inga disticha	TSL & BC
1641	Leguminosae	Inga dwyeri	TSL
1642	Leguminosae	Inga exilis	BC
1643	Leguminosae	Inga flagelliformis	TSL
1644	Leguminosae	Inga graciliflora	BC
1645	Leguminosae	Inga gracilifolia	TSL & BC
1646	Leguminosae	Inga grandiflora	TSL & BC
1647	Leguminosae	Inga heterophylla	TSL & BC
1648	Leguminosae	Inga huberi	TSL & BC
1649	Leguminosae	Inga inflata	BC
1650	Leguminosae	Inga ingoides	TSL & BC
1651	Leguminosae	Inga lallensis	TSL
1652	Leguminosae	Inga lateriflora	TSL & BC
1653	Leguminosae	Inga laurina	TSL & BC
1654	Leguminosae	Inga leiocalycina	TSL & BC
1655	Leguminosae	Inga lentiscifolia	TSL
1656	Leguminosae	Inga longiflora	TSL & BC
1657	Leguminosae	Inga longipes	TSL
1658	Leguminosae	Inga macrophylla	TSL & BC
1659	Leguminosae	Inga marginata	TSL & BC
1660	Leguminosae	Inga melinonis	TSL & BC
1661	Leguminosae	Inga multijuga	TSL
1662	Leguminosae	Inga neblinensis	BC
1663	Leguminosae	Inga nobilis	TSL & BC
1664	Leguminosae	Inga obidensis	TSL & BC
1665	Leguminosae	Inga oerstediana	TSL
1666	Leguminosae	Inga panurensis	BC
1667	Leguminosae	Inga paraensis	TSL & BC
1668	Leguminosae	Inga pavoniana	TSL
1669	Leguminosae	Inga pezizifera	TSL & BC
1670	Leguminosae	Inga pilosula	TSL & BC
1671	Leguminosae	Inga plumifera	TSL
1672	Leguminosae	Inga pruriens	TSL & BC
1673	Leguminosae	Inga psittacorum	TSL
1674	Leguminosae	Inga punctata	TSL & BC
1675	Leguminosae	Inga rhynchocalyx	TSL & BC
1676	Leguminosae	Inga rubiginosa	TSL & BC
1677	Leguminosae	Inga ruiziana	TSL & BC
1678	Leguminosae	Inga semialata	TSL
1679	Leguminosae	Inga sertulifera	TSL & BC
1680	Leguminosae	Inga setosa	TSL & BC
1681	Leguminosae	Inga spectabilis	TSL
1682	Leguminosae	Inga splendens	TSL & BC
1683	Leguminosae	Inga stenoptera	TSL & BC
1684	Leguminosae	Inga stipulacea	TSL & BC
1685	Leguminosae	Inga stipularis	TSL & BC
1686	Leguminosae	Inga striolata	TSL
1687	Leguminosae	Inga suberosa	TSL
1688	Leguminosae	Inga tarapotensis	TSL
1689	Leguminosae	Inga tenuistipula	TSL & BC
1690	Leguminosae	Inga tessmannii	TSL & BC
1691	Leguminosae	Inga thibaudiana	TSL & BC
1692	Leguminosae	Inga tomentosa	BC
1693	Leguminosae	Inga ulei	TSL & BC
1694	Leguminosae	Inga umbellifera	TSL & BC
1695	Leguminosae	Inga umbratica	TSL & BC
1696	Leguminosae	Inga velutina	TSL & BC
1697	Leguminosae	Inga venusta	BC
1698	Leguminosae	Inga vera	TSL & BC
1699	Leguminosae	Inga vismiifolia	TSL & BC
1700	Leguminosae	Inga yacoana	TSL & BC
1701	Leguminosae	Inga ynga	TSL
1702	Leguminosae	Jacqueshuberia purpurea	BC
1703	Leguminosae	Lecointea amazonica	BC
1704	Leguminosae	Leptolobium dasycarpum	TSL
1705	Leguminosae	Leptolobium nitens	TSL & BC
1706	Leguminosae	Leucaena leucocephala	TSL
1707	Leguminosae	Leucochloron incuriale	TSL
1708	Leguminosae	Libidibia paraguariensis	TSL
1709	Leguminosae	Lonchocarpus lilloi	TSL
1710	Leguminosae	Lonchocarpus longifolius	TSL
1711	Leguminosae	Lonchocarpus seorsus	TSL
1712	Leguminosae	Lonchocarpus sericeus	TSL & BC
1713	Leguminosae	Lonchocarpus spiciflorus	TSL & BC
1714	Leguminosae	Machaerium acutifolium	BC
1715	Leguminosae	Machaerium arboreum	TSL
1716	Leguminosae	Machaerium aristulatum	TSL
1717	Leguminosae	Machaerium biovulatum	TSL & BC
1718	Leguminosae	Machaerium dubium	TSL
1719	Leguminosae	Machaerium duckeanum	TSL
1720	Leguminosae	Machaerium ferox	TSL
1721	Leguminosae	Machaerium floribundum	TSL
1722	Leguminosae	Machaerium hirtum	TSL & BC
1723	Leguminosae	Machaerium hoehneanum	TSL
1724	Leguminosae	Machaerium inundatum	TSL
1725	Leguminosae	Machaerium isadelphum	TSL
1726	Leguminosae	Machaerium kegelii	TSL
1727	Leguminosae	Machaerium leiophyllum	TSL
1728	Leguminosae	Machaerium lunatum	BC
1729	Leguminosae	Machaerium macrophyllum	TSL
1730	Leguminosae	Machaerium madeirense	TSL
1731	Leguminosae	Machaerium multifoliolatum	TSL
1732	Leguminosae	Machaerium myrianthum	TSL
1733	Leguminosae	Machaerium nyctitans	TSL
1734	Leguminosae	Machaerium opacum	TSL
1735	Leguminosae	Machaerium paraense	TSL & BC
1736	Leguminosae	Machaerium quinata	TSL
1737	Leguminosae	Machaerium riparium	TSL
1738	Leguminosae	Machaerium robiniifolium	TSL
1739	Leguminosae	Machaerium salzmannii	TSL
1740	Leguminosae	Macrolobium acaciifolium	TSL & BC
1741	Leguminosae	Macrolobium angustifolium	TSL & BC
1742	Leguminosae	Macrolobium archeri	TSL
1743	Leguminosae	Macrolobium bifolium	TSL & BC
1744	Leguminosae	Macrolobium brevense	BC
1745	Leguminosae	Macrolobium campestre	BC
1746	Leguminosae	Macrolobium canaliculatum	BC
1747	Leguminosae	Macrolobium discolor	TSL & BC
1748	Leguminosae	Macrolobium evenulosum	TSL
1749	Leguminosae	Macrolobium flexuosum	BC
1750	Leguminosae	Macrolobium gracile	TSL & BC
1751	Leguminosae	Macrolobium limbatum	TSL & BC
1752	Leguminosae	Macrolobium longipes	BC
1753	Leguminosae	Macrolobium microcalyx	TSL & BC
1754	Leguminosae	Macrolobium molle	TSL & BC
1755	Leguminosae	Macrolobium multijugum	TSL & BC
1756	Leguminosae	Macrolobium pendulum	TSL & BC
1757	Leguminosae	Macrolobium punctatum	TSL & BC
1758	Leguminosae	Macrolobium suaveolens	TSL & BC
1759	Leguminosae	Macrolobium venulosum	TSL
1760	Leguminosae	Macrosamanea amplissima	TSL & BC
1761	Leguminosae	Macrosamanea discolor	BC
1762	Leguminosae	Macrosamanea duckei	TSL & BC
1763	Leguminosae	Macrosamanea prancei	BC
1764	Leguminosae	Macrosamanea pubiramea	TSL
1765	Leguminosae	Macrosamanea spruceana	TSL
1766	Leguminosae	Martiodendron elatum	BC
1767	Leguminosae	Martiodendron parviflorum	BC
1768	Leguminosae	Monopteryx uaucu	TSL
1769	Leguminosae	Mora excelsa	TSL
1770	Leguminosae	Mora paraensis	TSL & BC
1771	Leguminosae	Mucuna rostrata	TSL
1772	Leguminosae	Mucuna urens	TSL
1773	Leguminosae	Muellera campestris	TSL
1774	Leguminosae	Muellera denudata	TSL & BC
1775	Leguminosae	Muellera fendleri	TSL
1776	Leguminosae	Muellera frutescens	TSL
1777	Leguminosae	Muellera sericea	TSL
1778	Leguminosae	Myroxylon balsamum	BC
1779	Leguminosae	Ormosia coarctata	TSL & BC
1780	Leguminosae	Ormosia coccinea	TSL & BC
1781	Leguminosae	Ormosia costulata	BC
1782	Leguminosae	Ormosia coutinhoi	TSL & BC
1783	Leguminosae	Ormosia discolor	TSL & BC
1784	Leguminosae	Ormosia elata	BC
1785	Leguminosae	Ormosia excelsa	TSL & BC
1786	Leguminosae	Ormosia flava	TSL & BC
1787	Leguminosae	Ormosia grossa	TSL & BC
1788	Leguminosae	Ormosia holerythra	BC
1789	Leguminosae	Ormosia macrocalyx	TSL & BC
1790	Leguminosae	Ormosia macrophylla	TSL
1791	Leguminosae	Ormosia nobilis	TSL & BC
1792	Leguminosae	Ormosia paraensis	TSL & BC
1793	Leguminosae	Ormosia smithii	TSL & BC
1794	Leguminosae	Ormosia williamsii	BC
1795	Leguminosae	Paloue brasiliensis	BC
1796	Leguminosae	Paloue guianensis	BC
1797	Leguminosae	Paloue induta	BC
1798	Leguminosae	Paramachaerium ormosioides	TSL & BC
1799	Leguminosae	Paramachaerium schomburgkii	BC
1800	Leguminosae	Parkia balslevii	TSL
1801	Leguminosae	Parkia cachimboensis	BC
1802	Leguminosae	Parkia discolor	TSL & BC
1803	Leguminosae	Parkia gigantocarpa	TSL & BC
1804	Leguminosae	Parkia igneiflora	TSL & BC
1805	Leguminosae	Parkia multijuga	TSL & BC
1806	Leguminosae	Parkia nitida	TSL & BC
1807	Leguminosae	Parkia panurensis	TSL & BC
1808	Leguminosae	Parkia pendula	TSL & BC
1809	Leguminosae	Parkia platycephala	TSL & BC
1810	Leguminosae	Parkia ulei	TSL & BC
1811	Leguminosae	Parkia velutina	TSL & BC
1812	Leguminosae	Peltogyne campestris	TSL & BC
1813	Leguminosae	Peltogyne catingae	TSL & BC
1814	Leguminosae	Peltogyne confertiflora	TSL
1815	Leguminosae	Peltogyne excelsa	TSL
1816	Leguminosae	Peltogyne heterophylla	BC
1817	Leguminosae	Peltogyne paniculata	TSL & BC
1818	Leguminosae	Peltogyne prancei	BC
1819	Leguminosae	Peltogyne venosa	TSL & BC
1820	Leguminosae	Pentaclethra macroloba	TSL & BC
1821	Leguminosae	Piptadenia buchtienii	TSL
1822	Leguminosae	Piptadenia pteroclada	TSL
1823	Leguminosae	Pithecellobium cochleatum	TSL
1824	Leguminosae	Plathymenia reticulata	TSL
1825	Leguminosae	Platymiscium filipes	TSL & BC
1826	Leguminosae	Platymiscium pinnatum	TSL & BC
1827	Leguminosae	Platymiscium pubescens	BC
1828	Leguminosae	Platymiscium stipulare	TSL & BC
1829	Leguminosae	Platymiscium trinitatis	TSL & BC
1830	Leguminosae	Platypodium elegans	BC
1831	Leguminosae	Poecilanthe amazonica	TSL
1832	Leguminosae	Pseudopiptadenia psilostachya	TSL & BC
1833	Leguminosae	Pseudopiptadenia suaveolens	TSL
1834	Leguminosae	Pseudosamanea guachapele	BC
1835	Leguminosae	Pterocarpus acapulcensis	TSL
1836	Leguminosae	Pterocarpus amazonum	TSL & BC
1837	Leguminosae	Pterocarpus officinalis	TSL & BC
1838	Leguminosae	Pterocarpus rohrii	TSL & BC
1839	Leguminosae	Pterocarpus santalinoides	TSL & BC
1840	Leguminosae	Recordoxylon speciosum	BC
1841	Leguminosae	Schizolobium parahyba	TSL & BC
1842	Leguminosae	Schnella alata	TSL
1843	Leguminosae	Schnella platycalyx	TSL
1844	Leguminosae	Sclerolobium froesii	TSL
1845	Leguminosae	Sclerolobium melanocarpum	TSL
1846	Leguminosae	Sclerolobium paniculatum	TSL
1847	Leguminosae	Senegalia loretensis	TSL & BC
1848	Leguminosae	Senegalia macbridei	TSL
1849	Leguminosae	Senegalia riparia	TSL
1850	Leguminosae	Senegalia tenuifolia	TSL
1851	Leguminosae	Senna bacillaris	BC
1852	Leguminosae	Senna bicapsularis	TSL & BC
1853	Leguminosae	Senna fruticosa	BC
1854	Leguminosae	Senna macranthera	BC
1855	Leguminosae	Senna macrophylla	BC
1856	Leguminosae	Senna multijuga	BC
1857	Leguminosae	Senna quinquangulata	TSL
1858	Leguminosae	Senna reticulata	TSL
1859	Leguminosae	Senna ruiziana	TSL
1860	Leguminosae	Senna scandens	TSL
1861	Leguminosae	Senna silvestris	TSL & BC
1862	Leguminosae	Senna spectabilis	TSL & BC
1863	Leguminosae	Stryphnodendron guianense	TSL & BC
1864	Leguminosae	Stryphnodendron microstachyum	BC
1865	Leguminosae	Stryphnodendron paniculatum	TSL & BC
1866	Leguminosae	Stryphnodendron polystachyum	TSL
1867	Leguminosae	Stryphnodendron porcatum	TSL
1868	Leguminosae	Stryphnodendron pulcherrimum	TSL & BC
1869	Leguminosae	Stryphnodendron racemiferum	TSL & BC
1870	Leguminosae	Stryphnodendron roseiflorum	BC
1871	Leguminosae	Swartzia acreana	TSL
1872	Leguminosae	Swartzia acuminata	TSL & BC
1873	Leguminosae	Swartzia angustifoliola	BC
1874	Leguminosae	Swartzia anomala	TSL & BC
1875	Leguminosae	Swartzia apiculata	BC
1876	Leguminosae	Swartzia arborescens	TSL & BC
1877	Leguminosae	Swartzia argentea	TSL & BC
1878	Leguminosae	Swartzia auriculata	TSL & BC
1879	Leguminosae	Swartzia benthamiana	TSL & BC
1880	Leguminosae	Swartzia brachyrachis	TSL & BC
1881	Leguminosae	Swartzia calva	BC
1882	Leguminosae	Swartzia cardiosperma	TSL
1883	Leguminosae	Swartzia corrugata	TSL
1884	Leguminosae	Swartzia cupavenensis	TSL
1885	Leguminosae	Swartzia cuspidata	TSL & BC
1886	Leguminosae	Swartzia dipetala	TSL
1887	Leguminosae	Swartzia duckei	BC
1888	Leguminosae	Swartzia emarginata	BC
1889	Leguminosae	Swartzia flavescens	BC
1890	Leguminosae	Swartzia glabrata	BC
1891	Leguminosae	Swartzia grandifolia	TSL & BC
1892	Leguminosae	Swartzia guianensis	TSL
1893	Leguminosae	Swartzia ingens	BC
1894	Leguminosae	Swartzia ingifolia	TSL & BC
1895	Leguminosae	Swartzia jorori	TSL & BC
1896	Leguminosae	Swartzia krukovii	BC
1897	Leguminosae	Swartzia laevicarpa	TSL & BC
1898	Leguminosae	Swartzia laurifolia	TSL & BC
1899	Leguminosae	Swartzia laxiflora	TSL
1900	Leguminosae	Swartzia leptopetala	TSL & BC
1901	Leguminosae	Swartzia longicarpa	BC
1902	Leguminosae	Swartzia longistipitata	BC
1903	Leguminosae	Swartzia lucida	BC
1904	Leguminosae	Swartzia macrocarpa	TSL & BC
1905	Leguminosae	Swartzia macrostachya	TSL
1906	Leguminosae	Swartzia manausensis	BC
1907	Leguminosae	Swartzia martii	BC
1908	Leguminosae	Swartzia microcarpa	TSL
1909	Leguminosae	Swartzia oblanceolata	TSL
1910	Leguminosae	Swartzia obscura	BC
1911	Leguminosae	Swartzia panacoco	TSL & BC
1912	Leguminosae	Swartzia pendula	BC
1913	Leguminosae	Swartzia polyphylla	TSL & BC
1914	Leguminosae	Swartzia racemosa	TSL & BC
1915	Leguminosae	Swartzia recurva	TSL & BC
1916	Leguminosae	Swartzia reticulata	TSL & BC
1917	Leguminosae	Swartzia rosea	BC
1918	Leguminosae	Swartzia schomburgkii	BC
1919	Leguminosae	Swartzia sericea	TSL & BC
1920	Leguminosae	Swartzia simplex	TSL
1921	Leguminosae	Swartzia tessmannii	TSL & BC
1922	Leguminosae	Swartzia tomentifera	TSL & BC
1923	Leguminosae	Swartzia triptera	BC
1924	Leguminosae	Swartzia ulei	TSL & BC
1925	Leguminosae	Swartzia vaupesiana	BC
1926	Leguminosae	Swartzia xanthopetala	BC
1927	Leguminosae	Tachigali alba	TSL & BC
1928	Leguminosae	Tachigali aurea	TSL
1929	Leguminosae	Tachigali bracteosa	BC
1930	Leguminosae	Tachigali candelabrum	BC
1931	Leguminosae	Tachigali cavipes	TSL & BC
1932	Leguminosae	Tachigali chrysophylla	TSL
1933	Leguminosae	Tachigali davidsei	TSL
1934	Leguminosae	Tachigali formicarum	BC
1935	Leguminosae	Tachigali glauca	BC
1936	Leguminosae	Tachigali goeldiana	BC
1937	Leguminosae	Tachigali guianensis	TSL & BC
1938	Leguminosae	Tachigali hypoleuca	TSL & BC
1939	Leguminosae	Tachigali macbridei	BC
1940	Leguminosae	Tachigali macropetala	BC
1941	Leguminosae	Tachigali macrostachya	BC
1942	Leguminosae	Tachigali melinonii	BC
1943	Leguminosae	Tachigali micropetala	BC
1944	Leguminosae	Tachigali myrmecophila	TSL
1945	Leguminosae	Tachigali odoratissima	TSL & BC
1946	Leguminosae	Tachigali paniculata	TSL & BC
1947	Leguminosae	Tachigali paraensis	BC
1948	Leguminosae	Tachigali physophora	TSL & BC
1949	Leguminosae	Tachigali plumbea	BC
1950	Leguminosae	Tachigali ptychophysca	TSL
1951	Leguminosae	Tachigali pubiflora	BC
1952	Leguminosae	Tachigali rigida	TSL & BC
1953	Leguminosae	Tachigali setifera	TSL
1954	Leguminosae	Tachigali subvelutina	TSL
1955	Leguminosae	Tachigali tinctoria	TSL & BC
1956	Leguminosae	Tachigali venusta	TSL
1957	Leguminosae	Tachigali vulgaris	TSL
1958	Leguminosae	Tamarindus indica	TSL
1959	Leguminosae	Taralea cordata	BC
1960	Leguminosae	Taralea nudipes	TSL & BC
1961	Leguminosae	Taralea oppositifolia	TSL & BC
1962	Leguminosae	Trischidium alternum	BC
1963	Leguminosae	Uleanthus erythrinoides	BC
1964	Leguminosae	Vachellia macracantha	TSL
1965	Leguminosae	Vatairea erythrocarpa	TSL
1966	Leguminosae	Vatairea fusca	BC
1967	Leguminosae	Vatairea guianensis	TSL & BC
1968	Leguminosae	Vatairea paraensis	TSL
1969	Leguminosae	Vatairea sericea	TSL
1970	Leguminosae	Vataireopsis speciosa	BC
1971	Leguminosae	Vigna racemosa	TSL
1972	Leguminosae	Vouacapoua americana	TSL & BC
1973	Leguminosae	Vouacapoua pallidior	TSL
1974	Leguminosae	Zapoteca portoricensis	BC
1975	Leguminosae	Zollernia paraensis	TSL & BC
1976	Leguminosae	Zygia ampla	TSL & BC
1977	Leguminosae	Zygia cataractae	TSL & BC
1978	Leguminosae	Zygia cauliflora	TSL & BC
1979	Leguminosae	Zygia claviflora	TSL
1980	Leguminosae	Zygia coccinea	TSL & BC
1981	Leguminosae	Zygia dinizii	BC
1982	Leguminosae	Zygia inaequalis	TSL
1983	Leguminosae	Zygia inundata	TSL & BC
1984	Leguminosae	Zygia juruana	TSL & BC
1985	Leguminosae	Zygia latifolia	TSL
1986	Leguminosae	Zygia longifolia	TSL & BC
1987	Leguminosae	Zygia racemosa	TSL & BC
1988	Leguminosae	Zygia ramiflora	TSL & BC
1989	Leguminosae	Zygia stipularis	BC
1990	Leguminosae	Zygia trunciflora	BC
1991	Leguminosae	Zygia unifoliolata	TSL & BC
1992	Linaceae	Hebepetalum humiriifolia	TSL
1993	Linaceae	Hebepetalum humiriifolium	TSL & BC
1994	Linaceae	Roucheria calophylla	TSL
1995	Linaceae	Roucheria columbiana	TSL & BC
1996	Loganiaceae	Antonia ovata	BC
1997	Loganiaceae	Bonyunia aquatica	TSL & BC
1998	Loganiaceae	Strychnos asperula	TSL
1999	Loganiaceae	Strychnos brasiliensis	TSL
[truncated: 1,616 more rows]
